1 The Mediator co-activator complex regulates Ty1 retromobility via alternative  
2 transcription start site selection  
3  
4  
5  
6

7 Alicia C. Salinero<sup>1</sup>, Elisabeth R. Knoll<sup>1</sup>, Z. Iris Zhu<sup>3</sup>, David Landsman<sup>3</sup>, M. Joan Curcio<sup>1,2\*¶</sup>, and  
8 Randall H. Morse<sup>1,2\*¶</sup>  
9

10  
11  
12 <sup>1</sup> Department of Biomedical Sciences, University at Albany School of Public Health, Albany, New  
13 York, United States of America  
14

15 <sup>2</sup> Wadsworth Center, New York State Department of Health, Albany, New York, United States of  
16 America  
17

18 <sup>3</sup> Computational Biology Branch, National Center for Biotechnology Information, National Library of  
19 Medicine, NIH, Bethesda, Maryland, United States of America  
20  
21  
22

23 \*Co-corresponding authors  
24

25 E-mail: [joan.curcio@health.ny.gov](mailto:joan.curcio@health.ny.gov) (MJC) and [randall.morse@health.ny.gov](mailto:randall.morse@health.ny.gov) (RHM)  
26  
27

28 ¶MJC and RHM are Joint Senior Authors  
29  
30  
31  
32  
33

34 **Abstract**

35 Retrotransposons are mobile genetic elements that replicate via an RNA intermediary and constitute a  
36 significant portion of most eukaryotic genomes. *Saccharomyces cerevisiae* has been invaluable to  
37 retrotransposon research due to the presence of an active retroelement known as Ty1. The retromobility  
38 of Ty1 is regulated both positively and negatively by numerous host factors, including several subunits  
39 of the Mediator transcriptional co-activator complex. Paradoxically, previous studies have implicated  
40 the nuclear Mediator complex in the regulation of post-translational steps in Ty1 retromobility. To  
41 attempt to resolve this apparent paradox, we have examined the effects of deleting non-essential  
42 Mediator subunits on the various stages of Ty1 retromobility. The Mediator core complex is organized  
43 into genetically and structurally defined head, middle, and tail modules, along with a transiently  
44 associated kinase module. We show that with the exception of the kinase module, deleting Mediator  
45 subunits has a major impact on Ty1 mobility. Disrupting the Mediator tail module decreases Ty1  
46 activity to undetectable levels, while disrupting the head or middle module increases Ty1 retromobility  
47 substantially. These major changes in retromobility are accompanied by insignificant differences in Ty1  
48 RNA or Gag protein levels in Mediator mutants relative to the wild-type strain. Decreased retromobility  
49 in tail module gene deletion mutants requires the Ty1 promoter in the 5' LTR and is correlated with  
50 increased expression of an internal transcript known as Ty1i, which encodes a dominant negative  
51 inhibitor of Ty1 retromobility. We present evidence that Mediator preferentially associates with the Ty1  
52 or Ty1i promoters in strains lacking specific Mediator head or tail subunits, respectively, indicating that  
53 Mediator controls Ty1 retromobility by governing transcription start site selection within Ty1 elements.  
54 This work elucidates a mechanism of host control of retrotransposon activity via promoter competition  
55 and provides mechanistic insight into transcriptional regulation of Ty1i RNA.

56

57

## 58 **Author Summary**

59 Retrotransposons are mobile genetic elements that copy their RNA genomes into DNA and insert the  
60 DNA copies into the host genome. These elements contribute to genome instability, control of host gene  
61 expression and adaptation to changing environments. Retrotransposons depend on numerous host factors  
62 for their own propagation and control. The retrovirus-like retrotransposon, Ty1, in the yeast  
63 *Saccharomyces cerevisiae* has been an invaluable model for retrotransposon research, and hundreds of  
64 host factors that regulate Ty1 retrotransposition have been identified. Non-essential subunits of the  
65 Mediator transcriptional co-activator complex have been identified as one set of host factors implicated  
66 in Ty1 regulation. Here, we report a systematic investigation of the effects of loss of these non-essential  
67 subunits of Mediator on Ty1 retrotransposition. Our findings reveal a heretofore unknown mechanism  
68 by which Mediator influences the choice of transcription start site (TSS) in Ty1 to modulate expression  
69 of an autoinhibitory transcript known as Ty1i RNA. Our results provide new insights into host control of  
70 retrotransposon activity via TSS selection and elucidate a novel mechanism by which different  
71 promoters compete for the Mediator co-activator.

72

## 73 **Introduction**

74 Retrotransposons have been extensively characterized as catalysts of evolutionary change and  
75 agents of genome instability [1–6]. In humans, retrotransposons have been shown to be upregulated in  
76 cancerous cells [7], and have been implicated in tumorigenesis [8]. Long terminal repeat (LTR)  
77 retrotransposons are of particular interest because they are the evolutionary progenitors of retroviruses,  
78 [9], and have been found to be influenced heavily by host factors that control retroviral propagation [10–  
79 17].

80

81 Research focused on the LTR-retrotransposons in *Saccharomyces cerevisiae* has been fundamental to  
82 our understanding of the mechanism by which LTR-retrotransposons replicate, and how they interact  
83 with the host genome [3,6,18]. Ty1 is the most abundant and active of these LTR-retrotransposons, with  
84 31 copies in the haploid genome and a mobility rate of approximately  $1 \times 10^{-7}$  to  $1 \times 10^{-5}$  per Ty1 element  
85 in each cell generation [19]. Retrotransposition initiates with transcription of the element (Fig 1A & B).  
86 The U3 region of the 5' LTR contains promoter sequences recognized by DNA binding transcriptional  
87 activators, as well as two TATA box sequences (Fig 1C). The 5.7kb Ty1 transcript extends from the R  
88 region of the 5' LTR and terminates in the R region of the 3' LTR (Fig 1B & C). This transcript contains  
89 two partially overlapping open reading frames, *GAG* and *POL*, the latter of which is translated only  
90 when a specific +1 frameshift event occurs in the overlapping region (Fig 1B). This frameshifting event  
91 enables production of two translational products, the p49-Gag protein and the p199-Gag-Pol  
92 polyprotein. Ty1 protease, a factor that is encoded in the *POL* ORF, processes p49-Gag to p45-Gag as  
93 an integral part of Ty1 protein maturation. The Gag-Pol polyprotein is processed to yield p45-Gag,  
94 protease, reverse transcriptase and integrase. In addition to its protein coding function, the Ty1 transcript  
95 serves as a template for reverse transcription of the element. This process occurs within a cytoplasmic  
96 capsid of Gag protein known as the virus-like particle (VLP) (Fig 1A & B) [18]. Following successful  
97 reverse transcription within the VLP, Ty1 cDNA is transported back to the nucleus and integrated into  
98 the host genome through the activity of integrase (Fig 1A) [20,21].

99 Ty1 relies extensively on autoregulatory factors and host factors to successfully complete its  
100 mobility cycle and limit its mobility so as not to destabilize the host genome [18,22]. One mechanism of  
101 auto-inhibition known as copy number control (CNC) is defined by a copy number-dependent decrease  
102 in Ty1 retrotransposition observed both in *S. cerevisiae* and its close relative, *S. paradoxus* [23–25]. The  
103 process has been studied extensively but until recently remained poorly understood. CNC is enforced by  
104 a dominant, *trans*-acting regulatory protein known as p22-Gag [25–28] that is translated from an internal

105 transcript, Ty1i, which begins 1 kb from the beginning of the Ty1 element within the *GAG* ORF (Fig  
106 1B) [25,29]. Binding sites for several DNA binding activator proteins are located within the *GAG* ORF  
107 upstream of the Ty1i start site (Fig 1C). Translation of Ty1i RNA produces a 22 kDa protein that lacks  
108 the N-terminal region of Gag. This truncated Gag protein retains the ability to associate with p49- or  
109 p45-Gag. However, incorporation of p22-Gag into the VLP disrupts particle formation, thereby halting  
110 Ty1 protein maturation and production of Ty1 cDNA [25–27,30].

111 Host factors that regulate Ty1 mobility include subunits of the Mediator transcriptional co-  
112 activator complex [31–36]. In *Saccharomyces cerevisiae*, Mediator is a 1.4 MDa complex composed of  
113 25 individual subunits organized into four modules (Fig 2A) [37–40]. The core Mediator complex  
114 contains the “head,” “middle,” and “tail” modules, while a fourth kinase module is transiently associated  
115 with the core complex in a context-specific manner [41–43]. The tail domain is generally responsible for  
116 Mediator’s association with transcriptional activator proteins, while the head and middle are involved in  
117 association of RNA Polymerase II (Pol II) and pre-initiation complex (PIC) formation [37,42]. The  
118 Mediator complex plays a crucial role in the formation of the PIC at all Pol II transcribed genes by  
119 acting as a bridge between DNA binding transcriptional activator proteins and the RNA Pol II  
120 transcription machinery [42–49].

121 Several studies have implicated individual Mediator subunits as either activators or repressors of  
122 Ty1 retromobility. Efforts to identify retromobility phenotypes in the absence of these subunits indicate  
123 that they affect a step in retrotransposition between transcription and integration [18]. The tail subunit  
124 Med16 was identified as an activator of Ty1 mobility [32,34,36] that acts at a stage following mRNA  
125 export to the cytoplasm [34], but prior to cDNA integration [32]. Med2 was also identified as an  
126 activator, but was not further characterized [36]. Conversely, the tail subunit Med3 was found to  
127 negatively affect mobility without altering levels of cytoplasmic RNA foci wherein VLPs are assembled  
128 [34,36]. Mediator head subunits Med20 and Med18 and the middle subunits Med1, Med10, Med31 and

129 Med9 were identified as repressors of Ty1 mobility [31,33–35]. Absence of the head or middle subunits  
130 Med20, Med18, Med31, or Med9 had no significant effect on Ty1 mRNA expression [34], but increased  
131 the amount of unintegrated Ty1 cDNA [35]. Additionally, in the absence of the middle subunits Med1 or  
132 Med10 Ty1 cDNA increased concurrently with elevated levels of Ty1 mobility [31]. Med1 has also been  
133 found to influence Ty1 mobility with minimal changes to Ty1 mRNA levels [31] or localization [34].  
134 Mediator kinase module subunits Med12 and Med13 were identified as activators of Ty1 mobility  
135 [32,36], with *med13*Δ exhibiting a decrease in cDNA production that aligns with Ty1 hypomobility [32].  
136 Taken together, these studies suggest that individual Mediator subunits positively or negatively regulate  
137 a post-transcriptional step in Ty1 retrotransposition. This conclusion is strikingly incongruous with  
138 Mediator’s canonical role as a transcriptional regulator. To date, no mechanistic characterization of  
139 Mediator’s positive and negative influences on Ty1 mobility has been undertaken, and an explanation  
140 for its post-transcriptional function in Ty1 mobility has been elusive.

141 In this study, we systematically determine the effects of deleting non-essential subunits of the  
142 Mediator complex on various steps in Ty1 retrotransposition, from Ty1 and Ty1i RNA expression to  
143 completion of the retrotransposition event. We show that deletion of Mediator complex subunits results  
144 in substantial, module-specific effects on the level of Ty1 retrotransposition. Consistent with previous  
145 findings, we find that Mediator subunit deletions have minimal effects on the levels of Ty1 RNA and  
146 Gag protein, but do result in substantial changes in the level of unintegrated cDNA that correspond to  
147 changes in the level of retrotransposition. We report for the first time that deletion of individual subunits  
148 of the tail module triad, Med2-Med3-Med15, increases recruitment of Mediator and Pol II to a  
149 secondary promoter within the Ty1 *GAG* ORF. Use of this internal promoter results in expression of  
150 Ty1i RNA, whose translation product, p22-Gag, is a potent inhibitor of VLP formation and Ty1 cDNA  
151 synthesis. In contrast, loss of Mediator head module subunit Med18 or Med20 decreases Mediator  
152 association with the internal Ty1i promoter and results in increased Ty1 mobility. Thus, Mediator

153 subunits control a post-transcriptional step in Ty1 mobility by modulating transcription of Ty1i RNA.  
154 Based on these observations, we propose a mechanism by which the Mediator tail anchors the pre-  
155 initiation complex to the Ty1 LTR promoter, thereby dampening transcription from the internal Ty1i  
156 promoter, while Mediator head subunits are strictly required for expression from the internal Ty1i  
157 promoter.

158

## 159 **Results**

160

### 161 *The Core Mediator Complex Has a Profound Effect on Ty1 Mobility*

162 Previous genetic screens have indicated the existence of a relationship between the Mediator  
163 complex and Ty1 retrotransposition [31,32,34,36,50]. These screens determined that individual  
164 Mediator subunits influence Ty1 mobility through post-transcriptional mechanisms; however, they  
165 employed different assays for retromobility, and differed in their identification of specific Mediator  
166 subunits contributing to Ty1 mobility. To systematically investigate the role of all non-essential subunits  
167 of Mediator in Ty1 mobility, a collection of strains, each containing a deletion of a non-essential  
168 Mediator subunit, was generated from a BY4741 progenitor strain containing a chromosomal *his3AI*-  
169 marked Ty1 element (S1 Table). These strains were then tested for Ty1*his3AI* mobility using an  
170 established quantitative mobility assay in which cells that sustain a retromobility event are detected as  
171 His<sup>+</sup> prototrophs (Fig 2B) [19]. A mutant lacking the SAGA complex component Spt3 was chosen as a  
172 negative control for Ty1 mobility due to the well-characterized requirement for Spt3 in Ty1 transcription  
173 and mobility [51,52].

174 Results from this assay indicate that Mediator influences Ty1*his3AI* mobility in a profound,  
175 module-specific manner. Deletion of genes encoding subunits in the head or middle module increased  
176 Ty1*his3AI* mobility approximately 100-fold. Conversely, deleting any subunit from the Med2-Med3-

177 Med15 tail module triad resulted in a mobility level that was more than 100-fold decreased relative to  
178 the wild-type strain, and below detection limits. The Med2-Med3-Med15 subunits are direct targets of  
179 DNA-binding activator proteins [42,47,53,54], and deletions of these subunits exhibit similar  
180 phenotypes [42,53]. In contrast, two other tail module subunits that exhibit distinct phenotypes when  
181 deleted, Med5 and Med16, do not appear to affect Ty1 mobility. The transiently associated kinase  
182 module also does not substantially influence Ty1 mobility. Kinase module deletion strains were omitted  
183 from further analysis in this work. The disparate effects of deleting subunits in different modules is  
184 consistent with previous data indicating that the Mediator complex regulates the expression of some  
185 gene sets in a module-dependent manner [41].

#### 186 187 *Mediator Influences Ty1 cDNA without Altering Ty1 Transcript Levels*

188         Given Mediator's role as a transcriptional co-activator, we first sought to determine whether the  
189 changes in Ty1 mobility observed in the Mediator subunit deletion strains were caused by altered Ty1  
190 transcription. Changes in the abundance of Ty1 RNA observed by northern blotting in head, middle or  
191 tail module gene deletion strains relative to the wild-type strain were modest and not statistically  
192 significant ( $p>0.1$ , one-way ANOVA) (Fig 3A). These data indicate that Mediator head, middle and tail  
193 subunits do not regulate Ty1 retromobility by affecting production of full-length Ty1 transcripts.

194         A series of non-coding antisense transcripts are also expressed from Ty1 elements via an internal  
195 promoter (Fig 1B & C). These transcripts initiate from distinct positions within the first 700 bp of the  
196 Ty1 element, and their expression is enhanced in certain hypomobile strains, most notably in an *spt3Δ*  
197 mutant [24,29]. Levels of Ty1 antisense transcripts (Ty1AS RNA) were measured to determine whether  
198 Mediator was altering expression of these transcripts and thereby influencing Ty1 mobility (Fig 3A). A  
199 modest increase of approximately 2-fold in Ty1AS RNA was observed in the mediator tail subunit  
200 deletion strains relative to the wild-type strain (Fig 3A). When compared with increases of a similar



201 magnitude in the *med31*Δ hypermobile strain, and contrasted with the 10-fold increase in the  
202 hypomobile *spt3*Δ strain, it would appear that Ty1AS RNA expression is not likely to be a major  
203 contributing factor to tail-mediated repression of Ty1.

204 To independently confirm that the substantial changes in retromobility in Mediator subunit  
205 deletion strains were not a result of minor changes in Ty1 RNA levels, or in alterations to Ty1  
206 polyadenylation that would result in translational defects, the levels of Gag, the major product of Ty1  
207 RNA, were measured using western blot analysis (Fig 3B). As with Ty1 RNA and Ty1AS RNA, there  
208 were only moderate (<2 fold relative to the wild-type strain) changes in the levels of Gag protein.  
209 Together, these data strongly support the argument that Mediator regulates a post-transcriptional step in  
210 Ty1 retromobility, and does so without altering the steady state levels of the Gag protein (Fig 3A & B).

211 Assessing the level of unintegrated cDNA provides an indication of the efficiency with which  
212 Ty1 has undergone VLP formation and reverse transcription of the template mRNA. This assay involves  
213 the separation of *SphI*-digested genomic DNA, which is subsequently probed for Ty1 sequences at the 3'  
214 end of *POL* [15,31], allowing for the visualization of bands representing the junction between the 3' end  
215 of each Ty1 element and flanking genomic DNA. Differences in the size of the bands are due to the  
216 different location of *SphI* sites in DNA flanking Ty1 at different locations. In this assay, the smallest  
217 band represents unintegrated Ty1 cDNA because of the absence of flanking genomic DNA. We  
218 performed this assay to compare the ratio of unintegrated cDNA to genomic Ty1 DNA in wild-type  
219 yeast to that in Mediator mutants. We observed increased cDNA levels for *med18*Δ, *med20*Δ, *med31*Δ,  
220 and *med1*Δ mutants, while loss of tail module triad subunits Med2, Med3, or Med15 reduced cDNA to  
221 nearly undetectable levels (Fig 3C). Thus, both hyper- and hypomobile mutants exhibited cDNA levels  
222 that strongly correlated with changes in Ty1*his3AI* mobility (Fig 2B). The magnitude of changes in Ty1  
223 cDNA levels are not as great as those of Ty1 mobility, but this is expected because this assay measures  
224 steady-state levels of cDNA, whereas the mobility assay measures accumulated mobility events.

225 Together, these data indicate that Mediator core subunits regulate a post-transcriptional step in Ty1  
226 mobility wherein deletion of Mediator complex genes alters the accumulation of Ty1 cDNA without  
227 substantially altering overall Ty1 transcript or Gag protein levels.

228  
229 *The Tail Module Triad Regulates Ty1 via Modulation of Ty1i Expression*

230 The observation that Mediator regulates a post-transcriptional step in Ty1 retromobility, and that  
231 Mediator subunits regulate the level of Ty1 cDNA, led us to consider the possibility that Mediator  
232 influences the expression of the internal Ty1i transcript, which encodes p22-Gag, the dominant negative  
233 inhibitor of retromobility. The post-transcriptional effects on Ty1 mobility caused by increasing  
234 expression of p22-Gag [25] are very similar to those observed in Mediator tail triad deletion mutants.  
235 We therefore sought to determine whether expression of Ty1i RNA is altered by deletion of Mediator  
236 subunits.

237 Ty1i RNA is not easily detected in northern blots of total cellular mRNA (Fig 3A), as it is  
238 obscured by the highly abundant Ty1 transcript. Therefore polyA<sup>+</sup> mRNA of the wild-type strain and  
239 Mediator deletion strains was subject to northern analysis to achieve better separation of the Ty1 and  
240 Ty1i transcripts, as shown previously [25]. This analysis revealed an increase in Ty1i mRNA relative to  
241 levels of Ty1 mRNA in strains with tail module triad gene deletions, suggesting a likely mechanism for  
242 the decreased Ty1 mobility seen in these mutants (Fig 4A). Notably, Ty1i mRNA levels in the tail  
243 module subunit deletion *med5*Δ were similar to those in the wild-type strain, which is consistent with the  
244 wild-type mobility seen in this strain. In contrast to tail module triad gene deletion strains, the total  
245 amount of Ty1i mRNA and in the ratio of Ty1i RNA to Ty1 RNA in head and middle subunit gene  
246 deletion strains were not significantly altered relative to the wild-type strain. Given the low level of Ty1i  
247 mRNA in all these strains, we were unable to determine whether decreased Ty1i mRNA levels  
248 accompany the hypermobility phenotypes of head and middle subunit gene deletion strains.

249

250 Previous work from the Morse lab compared genome-wide occupancy of Pol II in wild type and *med3Δ*  
251 *med15Δ* yeast [55,56]. The effects of the *med3Δ med15Δ* mutation are similar to those of the single  
252 Mediator tail module triad subunit deletions [55], and so we used this data to compare Pol II occupancy  
253 on all Ty1 elements in wild type and *med3Δ med15Δ* yeast (Fig 4B). The results show that Pol II  
254 occupancy in *med3Δ med15Δ* yeast is reduced exclusively in the first 1 kb of the Ty1 element. Pol II  
255 occupancy in the *med3Δ med15Δ* double mutant and wild-type strain became equivalent near the Ty1i  
256 transcription start site (TSS) and remained so until the transcription end site (TES) of both Ty1 sense-  
257 strand transcripts (Fig 4B). This indicates that the Mediator tail preferentially directs Pol II to the  
258 primary Ty1 TSS. Absence of subunits from the tail module triad increases transcription from the  
259 internal Ty1i TSS, explaining the elevated levels of Ty1i RNA in tail module triad mutants (Fig 4A).

260 The elevated Ty1i RNA levels observed in Mediator tail module triad mutants would be  
261 predicted to give rise to increased levels of p22-Gag and its cleavage product, p18-Gag. To test this  
262 prediction, we performed western blotting using an anti-p18 polyclonal antibody. As expected, elevated  
263 levels of the internal Ty1i transcript were accompanied by substantial increases in p22-Gag in Mediator  
264 tail module triad gene deletion strains, whereas no p22-Gag was detected in the wild-type strain or  
265 Mediator head and middle module mutants (Fig 4C). Notably, levels of p18-Gag were not correlated  
266 with p22-Gag or Ty1 retromobility levels in the wild-type strain or any Mediator subunit deletion strain.  
267 This is in contrast to a previous report in *Saccharomyces paradoxus* [25], a close relative of *S. cerevisiae*  
268 that lacks endogenous Ty1 elements, where increasing the copy number of introduced Ty1 elements  
269 results in higher levels of both p22-Gag and p18-Gag. Nonetheless, the data presented demonstrate that  
270 diminished Ty1 retromobility is inversely correlated with elevated Ty1i RNA and p22-Gag levels in  
271 Mediator tail triad gene deletion strains, strongly suggesting that enhanced occupancy of Pol II at the  
272 internal Ty1i promoter is the underlying cause of undetectable Ty1 retromobility in tail mutants. Given

273 that p22-Gag blocks post-transcriptional steps in Ty1 mobility, the findings also reveal how Mediator  
274 functions in its canonical role as a transcriptional co-activator to block Ty1 retrotransposition at a post-  
275 transcriptional step.

276 While the molecular phenotypes of tail module triad mutants present a clear mechanistic  
277 paradigm, the results for head and middle mutants do not shed light on whether an opposing mechanism  
278 of Ty1i RNA regulation causes the hypermobility phenotype of head and middle mutants. Basal levels  
279 of Ty1i RNA and p22-Gag in the wild-type strain remain below detection in northern blots (Fig 4A) and  
280 western blots (Fig. 4C), respectively, thus making it impossible to detect a reduction in Ty1i RNA or  
281 p22-Gag in head and middle mutants.

282

### 283 *The Mediator Tail Module Regulates Ty1 Mobility via an Interaction with the LTR Promoter*

284 We next sought to gain broader mechanistic insight into tail module-regulated repression of Ty1i  
285 RNA. The Ty1 LTR contains two TATA boxes within its U3 region (Fig 1), and its transcription is  
286 Spt3-dependent (Fig 3 & 4), indicating that Ty1 belongs to the SAGA-dependent class of genes. This  
287 class is enriched in highly regulated genes such as stress-response genes, and is characterized by a  
288 promoter structure that is distinct from that of the largely constitutively-active, TATA-less, TFIID-  
289 dependent genes [57,58]. In contrast to the Ty1 promoter, the region upstream of the Ty1i TSS lacks any  
290 consensus TATA element, indicating that Ty1i belongs to the class of TFIID-dependent genes (Fig 4A).  
291 As SAGA-dependent genes show a preferential dependence on the tail module triad relative to TFIID-  
292 dependent genes [55], we theorized that the tail module triad might operate by favoring the association  
293 of Mediator with the SAGA-dependent U3 promoter that is upstream of Ty1 (Fig 1). As a result of this  
294 association, the Mediator head and middle modules would be tethered to the Ty1 promoter, and would in  
295 turn preferentially recruit Pol II to the Ty1 TSS rather than the internal Ty1i TSS. Disruption of this  
296 Mediator-U3 interaction via deletion of a tail module gene could allow for Mediator and the PIC to

297 instead associate with the less robust TFIID-dependent Ty1i promoter. To test the role of the U3  
298 promoter in governing the effect of Mediator mutations on Ty1 mobility, the U3 region of the Ty1 LTR  
299 was swapped for the transcriptionally robust, TFIID-dependent *TEF1* promoter sequence on a *CEN*-  
300 plasmid-based Ty1*his3AI* element (Fig 5A). The *TEF1* promoter was chosen based on findings that  
301 deletions of non-essential Mediator subunits do not alter *TEF1* expression substantially [55,59]. The  
302 effects of Mediator subunit deletions on retromobility of the *TEF1* promoter-driven Ty1*his3AI* element  
303 versus the LTR promoter-driven Ty1*his3AI* element expressed from the same vector were then  
304 compared (Fig 5B).

305 To our surprise, the retromobility frequency of the Ty1*his3AI* element on a single-copy *CEN*-  
306 plasmid (referred to as LTR-Ty1*his3AI*) was nearly identical to that of P<sub>*TEF1*</sub>-Ty1*his3AI* on the same  
307 vector in a wild-type background ( $1.13 \times 10^{-5}$  versus  $1.64 \times 10^{-5}$  His<sup>+</sup> prototrophs per cell; Fig. 5B). The  
308 only difference between these elements is the promoter, and unlike the *TEF1* promoter, the Ty1  
309 promoter has been reported to be weak [60]. To determine whether similar levels of Ty1*his3AI* RNA are  
310 expressed from the plasmid-borne LTR-Ty1*his3AI* and P<sub>*TEF1*</sub>-Ty1*his3AI* elements, we performed  
311 northern blotting of polyA<sup>+</sup> RNA using a *HIS3* probe to detect Ty1*his3AI* and Ty1*his3AI* RNA. The  
312 level of Ty1*his3AI* RNA was only about 3-fold higher when expressed from the *TEF1* promoter relative  
313 to the LTR in the wild type strain (Fig. 5C). Together with the fact that retromobility of the *CEN*-based  
314 LTR-Ty1*his3AI* element is >30-fold higher than the chromosomal Ty1*his3AI* element (compare Fig 5B  
315 to Fig 2B), the findings suggest that overall Ty1 RNA levels, including Ty1*his3AI* RNA, are markedly  
316 increased by LTR-Ty1*his3AI* or P<sub>*TEF1*</sub>-Ty1*his3AI* expression. Moreover, the internal Ty1*his3AI*  
317 transcript was not detected in the wild-type strain expressing LTR-Ty1*his3AI* or P<sub>*TEF1*</sub>-Ty1*his3AI*,  
318 suggesting that the total Ty1i/Ty1 RNA ratio in the presence of these plasmids is substantially lower  
319 than in their absence. Therefore, we propose that retromobility in the strain expressing LTR-Ty1*his3AI*  
320 is unexpectedly high because of derepression of the *CEN*-based LTR promoter by an unknown

321 mechanism, high levels of Ty1 RNA bearing the *his3AI* reporter and a very low total Ty1i /Ty1 RNA  
322 ratio.

323 In the wild-type, LTR-Ty1*his3AI* plasmid-bearing strain with low Ty1i /Ty1 RNA ratios,  
324 deletion of *MED3* diminished retromobility more than 1000-fold (Fig. 5B). In contrast, deleting either  
325 tail module triad gene, *MED3* or *MED15*, had little effect on retromobility of the  $P_{TEFI}$ -Ty1*his3AI*  
326 element (Fig 5B). These findings provide strong evidence that the LTR promoter is required for  
327 diminished retromobility in tail triad module mutants. This lends further support to the idea that the tail  
328 module triad promotes the association of Mediator with the SAGA-dependent U3 promoter in the LTR,  
329 and that disruption of the tail module allows increased Mediator recruitment to the Ty1i promoter.

330 In contrast to the above results, deletion of genes encoding head (*MED20*) or middle module  
331 (*MED31* or *MED1*) subunits had modest and equivalent effects on retromobility of  $P_{TEFI}$ -Ty1*his3AI* and  
332 LTR-Ty1*his3AI*. These results suggest that head and middle modules do not depend on the SAGA-  
333 dependent U3 promoter for their repression of retromobility. We hypothesize that deletion of head and  
334 middle module subunits increases retromobility by favoring Mediator association with the Ty1 promoter  
335 and therefore decreasing the Ty1i/Ty1 RNA ratio. Deleting head and middle module genes may have  
336 only a modest effect on retromobility in a wild-type strain expressing LTR-Ty1*his3AI* or  $P_{TEFI}$ -  
337 Ty1*his3AI* because the Ty1i /Ty1 RNA ratios are very low to begin with.

338 Levels of Ty1*his3AI* RNA driven from the LTR or  $P_{TEFI}$  promoter were only modestly altered  
339 ( $\leq 4$ -fold up or down) by deletion of Mediator head and middle subunits, and not in a manner consistent  
340 with the observed retrotransposition frequencies.  $P_{TEFI}$ -driven Ty1*his3AI* RNA levels in the *med15* $\Delta$   
341 mutant were about 4-fold higher than in the wild-type strain. It is possible that this elevated level of  
342 Ty1*his3AI* RNA contributes to overcoming the inhibitory effect of a high Ty1i/Ty1 RNA ratio in tail  
343 module triad mutants (Fig. 4A), thereby allowing Ty1*his3AI* to transpose at similar frequencies in wild-  
344 type, *med3* $\Delta$  and *med15* $\Delta$  strains with  $P_{TEFI}$ -Ty1*his3AI* (Fig. 5B). However, our data taken together

345 support the idea that a failure to induce Ty1*his3AI* RNA expression when the LTR promoter is replaced  
346 by P<sub>TEF1</sub> is the major reason why retromobility is not repressed in tail module triad gene deletion strains  
347 expressing P<sub>TEF1</sub>-Ty1*his3AI*.

348 Because the internal Ty1*his3AI* transcript was not detected, even in the *med3Δ* mutant harboring  
349 the LTR-Ty1*his3AI* plasmid (Fig 5C), we could not determine whether Ty1*his3AI* RNA levels were  
350 higher when expressed from LTR-Ty1*his3AI* versus P<sub>TEF1</sub>-Ty1*his3AI*. Nonetheless, derepression of  
351 retromobility in tail module triad mutants when Ty1*his3AI* expression is under control of the TFIID-  
352 dependent *TEF1* promoter is consistent with repression of Ty1 mobility in tail module triad mutants  
353 being dictated by loss of an interaction between Mediator tail and the TATA-containing, SAGA-  
354 dependent LTR promoter.

355

356 *Ty1i* RNA Is Repressed by the Mediator Tail Module Triad Independently of Full Length Ty1

357 *Transcription*

358 Our results indicate that the Mediator tail module triad acts at the Ty1 promoter to repress  
359 expression of Ty1i RNA. We considered two mechanisms by which this might occur. First, recruitment  
360 of Mediator to the Ty1 promoter could lead to enhanced Ty1 transcription, and this could repress the  
361 downstream Ty1i promoter by readthrough effects. In this mechanism, the polymerase moving from the  
362 Ty1 TSS could disrupt transcription factor or PIC binding to the Ty1i promoter [61–63]. In the second  
363 mechanism, the Mediator tail could act as a direct repressor of the Ty1i promoter.

364 To distinguish between these two mechanistic possibilities, we wished to determine whether  
365 increased Ty1i expression would still be observed in tail module triad deletion mutants under conditions  
366 where transcription from full length Ty1 was strongly repressed. To this end, we employed a plasmid-  
367 based Ty1 element under control of the *GALI* promoter (Fig 6) [64]. When grown in glucose-containing  
368 media that represses the *GALI* promoter, expression of Ty1 RNA is assumed to be repressed, but Ty1i

369 RNA is expressed [25]. The 2 $\mu$ M-plasmid-borne *GALI*-Ty1 element (pGTy1) that we used also has an  
370 internal deletion within the *POL* ORF, which facilitates resolution of Ty1 $\Delta$ POL RNA from full-length  
371 Ty1 mRNA, thus permitting a direct comparison between endogenous Ty1 RNA and plasmid-derived  
372 Ty1 $\Delta$ POL RNA by northern blot or single strand cDNA synthesis followed by PCR analysis.

373 We first sought to verify that Ty1 $\Delta$ POL RNA expression was repressed and Ty1i $\Delta$ POL RNA  
374 was preferentially expressed in glucose. To distinguish Ty1 $\Delta$ POL from Ty1i $\Delta$ POL transcripts, the same  
375 reverse primer was used with one of two forward primers located 250bp upstream or 250bp downstream  
376 of the Ty1i TSS (Fig 6, top). Use of these primers precluded use of real time PCR; instead, aliquots from  
377 the reactions were removed at two cycle intervals for analysis by gel electrophoresis. Using this strategy,  
378 we found that Ty1i $\Delta$ POL cDNA amplified four to five cycles before Ty1 $\Delta$ POL cDNA in strains grown  
379 in glucose (Fig 6). This verifies preferential expression of Ty1i RNA from this element by about 16- to  
380 32-fold in cells grown in glucose, even in the hypermobile *med20* $\Delta$  genetic background.

381 To examine the effect of Mediator subunit deletions on Ty1i RNA expression from  
382 pGTy1 $\Delta$ POL, levels of Ty1 and Ty1i RNA from endogenous Ty1 elements and Ty1 $\Delta$ POL and  
383 Ty1i $\Delta$ POL RNA from pGTy1 $\Delta$ POL were measured by northern blotting (Fig 7A & B). Levels of  
384 endogenous Ty1 RNA were not significantly affected by deletion of different Mediator subunits. Ty1i  
385 and Ty1i $\Delta$ POL RNA levels also remained nearly equivalent in the wild-type strain and head and middle  
386 subunit deletion strains; however, Ty1i and Ty1i $\Delta$ POL RNAs were markedly increased in strains  
387 lacking the tail module subunit, *MED2* or *MED3* (Fig 7A & B). Therefore, disruption of the Mediator  
388 tail increases Ty1i $\Delta$ POL RNA expression, even when expression from the upstream Ty1 promoter is  
389 suppressed. This indicates that the tail module triad does not suppress expression of Ty1i RNA via  
390 readthrough inhibition from the upstream Ty1 promoter. Taken together with the altered occupancy of  
391 Pol II over Ty1 seen in yeast lacking tail module triad subunits (Fig 4B), these results suggest that the



392 Mediator tail module triad may act to direct PIC formation preferentially to the Ty1 TSS over the Ty1i  
393 TSS.

394 Chromosomal Ty1*his3AI* retromobility in strains carrying pGTy1 $\Delta$ POL is decreased relative to  
395 strains of the same genotype containing no plasmid (compare Fig 7C to Fig 2B), consistent with an  
396 increase in Ty1i RNA. We could not determine whether expression of pGTy1 $\Delta$ POL increases repression  
397 of Ty1*his3AI* mobility in tail module triad gene deletion strains, since retromobility is already  
398 undetectable in the absence of the plasmid. Deletion of head and middle module genes still increased  
399 retromobility in the presence of the pGTy1 $\Delta$ POL plasmid as it did in its absence (Fig 2B), although less  
400 robustly in the middle subunit gene deletion strains, *med1* $\Delta$  and *med31* $\Delta$ , for reasons we cannot explain.

401

402 *Mediator Tail and Head Module Subunits Direct Mediator Association with Ty1 and Ty1i Proximal*  
403 *Promoters, Respectively*

404 Results presented so far indicate that the opposing effects of deletion of subunits from the  
405 Mediator head module (*med18* $\Delta$  and *med20* $\Delta$ ) and tail module triad (*med2* $\Delta$ , *med3* $\Delta$ , and *med15* $\Delta$ ) on  
406 Ty1 mobility occur via mechanisms that operate at a similar stage in the Ty1 life cycle (Fig 3).  
407 Decreased mobility in mutants lacking subunits from the tail module triad is accompanied by increased  
408 expression of Ty1i, and similarly decreased occupancy of Pol II in the first 1kb of Ty1, suggesting a  
409 causal mechanism (Fig 4). However, Ty1i RNA and p22-Gag levels are very low in wild type yeast, and  
410 we have not been able to detect any decrease of this already low level in *med18* $\Delta$  or *med20* $\Delta$  mutants.

411 To gain additional insight into how these mutants give rise to the observed hypermobility  
412 phenotype, and into the mechanism by which both kinds of deletions affect Ty1 mobility, we used ChIP-  
413 seq to examine Mediator association with the proximal promoter regions of Ty1 and Ty1i in wild type  
414 yeast and Mediator mutants. For this purpose, we used *kin28* Anchor Away (*kin28-AA*) strains harboring  
415 appropriate deletions of Mediator subunits. The *kin28-AA* conditional mutation allows eviction of Kin28

416 from the nucleus to the cytoplasm by addition of rapamycin [65,66]. Eviction of Kin28 prevents  
417 phosphorylation of Ser5 of the Pol II C-terminal domain (CTD). This impedes release of engaged Pol II  
418 from the proximal promoter of active genes, thus stabilizing association of Mediator, allowing robust  
419 ChIP signals to be observed at gene promoters [66,67].

420 ChIP-seq against myc-tagged Med17 from the head module or Med15 from the tail module  
421 reveals peaks of Mediator association at both Ty1 and Ty1i TSS's in wild type yeast (Fig 8 and S1 Fig).  
422 In a *med2Δ med3Δ med15Δ* mutant, Med17 association with Ty1 is decreased relative to its association  
423 with Ty1i, consistent with increased Ty1i mRNA levels in tail module triad deletion mutants. In  
424 contrast, occupancy by Med17 and Med15 at Ty1i is virtually eliminated in *med18Δ* (S1 Fig) and  
425 *med20Δ* (Fig 8) mutants, while Ty1 occupancy remains robust. These results strongly suggest that the  
426 relative occupancy levels by Mediator, and presumably by the PIC, at Ty1 and Ty1i proximal promoters  
427 are dictated by Mediator subunits, and play a critical role in governing Ty1 mobility.

428

## 429 Discussion

430 This work provides a systematic analysis of the role of the Mediator complex in Ty1  
431 retrotransposition. We describe a novel mechanism in which subunits from the Mediator tail and head  
432 modules preferentially direct transcription from the Ty1 and Ty1i promoters, respectively, thereby  
433 affecting the balance of Ty1 and Ty1i RNA and, consequently, of retrotransposition. These findings are  
434 reminiscent of a recent report that retrotransposition of the *Tf2* retrotransposon in *S. pombe* is increased  
435 in stressed cells by a mechanism involving altered TSS selection [68]. The mechanism in this latter  
436 study appears to be very different from that described here, as the altered TSS usage occurring in  
437 stressed cells depends on a reduction in nucleosome occupancy under stress conditions at the TSS for  
438 the full length, functional *Tf2* transcript. Nucleosome occupancy at the *Tf2* TSS depends on the activity  
439 of Fun30 chromatin remodelers, and there was no evident relation to Mediator function. However,

440 Mediator is subject to stress-dependent phosphorylation that affects gene expression [69], suggesting a  
441 possible mechanism for regulating Ty1 retromobility during stress.

442 Previous reports provided evidence that loss of various non-essential Mediator subunits affected  
443 Ty1 mobility [31–36,50], but they did not systematically characterize the role of Mediator in this  
444 process, nor did they provide an explanation for how a transcriptional activator appeared to be acting  
445 post-transcriptionally. By examining the effects of deletion of all non-essential Mediator subunits on  
446 Ty1 retromobility, we show that Mediator functions as both an activator and repressor of Ty1  
447 retromobility (Fig 2B). Deletions of subunits from different, structurally defined domains exhibited  
448 distinct effects, consistent with genetic data [41,55,70]. Deletion of subunits from the kinase module had  
449 little effect on Ty1 mobility, while loss of subunits from the Mediator tail module triad reduced mobility  
450 by at least 100-fold, and deletion of subunits from the head and middle modules increased retromobility  
451 about 100-fold (Fig 2B). Changes in unintegrated Ty1 cDNA levels were strongly correlated with the  
452 changes in retromobility, while levels of Ty1 RNA and of Gag protein showed little alteration in any of  
453 the Mediator deletion mutants (Fig 3). These results suggest that increased retromobility in head or  
454 middle module mutants and decreased retromobility in tail module triad mutants, are opposing effects  
455 that transpire through the same pathway.

456 Our finding that deletion of kinase module genes has a modest effect on Ty1 mobility relative to  
457 changes seen in the head or tail subunit deletion strains (Fig 2B) is not entirely unexpected, as the kinase  
458 module has been shown to be involved in the regulation of a smaller subset of genes than the Mediator  
459 core and is not necessary for the function of the core Mediator complex [43,71]. The finding that  
460 deletion of *MED12* increases Ty1 retromobility modestly and deletion of *MED13* has a minimal effect is  
461 inconsistent with previous work that implicated *SRB8/MED12* and *SSN2/MED13* in activation of Ty1  
462 retromobility [32,35]. However, this disparity could be the result of differences in the retrotransposition  
463 assays and other experimental conditions.

464 A key insight into the mechanism by which tail module triad gene deletions cause decreased Ty1  
465 mobility was obtained by northern analysis of Ty1 polyA<sup>+</sup> transcripts, which revealed increased levels  
466 of the internally generated, inhibitory Ty1i transcript in these deletion mutants (Fig 4). Increased Ty1i  
467 RNA was accompanied by elevated levels of p22-Gag, which interferes with VLP formation and  
468 production of Ty1 cDNA [25,30]. The increased expression of Ty1i is caused by a direct effect on  
469 transcription, as opposed to Ty1i RNA processing or stability, based on the altered occupancy of Pol II  
470 in a *med3Δ med15Δ* yeast mutant (Fig 4). These findings strongly suggest that the tail module triad  
471 supports Ty1 retrotransposition by inhibiting transcription of Ty1i RNA relative to transcription of Ty1  
472 RNA.

473 If head and middle module subunits of Mediator regulate Ty1 retromobility through the same  
474 pathway as tail module triad subunits, albeit in opposite fashion, their deletion ought to result in  
475 *decreased* levels of Ty1i RNA. We did not find evidence for such a decrease from northern analysis of  
476 Ty1i transcripts, or by monitoring p22-Gag expression by western blot (Fig 4). However, levels of Ty1i  
477 mRNA and p22-Gag are very low in wild-type cells, making detection of any decrease inherently  
478 difficult. Furthermore, the product of Ty1i is a potent inhibitor of retrotransposition [25], and subtle  
479 changes in transcript levels or the relative translatability of transcripts could conceivably produce  
480 substantial changes in mobility levels. Adding to these difficulties, retrotransposition is a rare event, and  
481 it is not currently feasible to determine the molecular characteristics of cells that are undergoing a  
482 mobility event against the massive background of cells that are not.

483 In spite of these limitations, we have obtained evidence that both tail module triad and head  
484 module subunits control Ty1 mobility by regulating the relative levels of Ty1 and Ty1i RNA through a  
485 promoter competition mechanism (Fig 9). First, we showed that levels of Ty1i RNA expressed from a  
486 pGTy1ΔPOL reporter increase in *med2Δ* and *med3Δ* mutant yeast grown in glucose, where the *GALI*  
487 promoter driving Ty1ΔPOL has very low activity (Fig 6 & 7). This finding indicates that repression of

488 the Ty1i promoter by the tail module triad is unlikely to occur through a mechanism depending on  
489 readthrough transcription from the Ty1 promoter. Next, we used ChIP-seq to compare Mediator  
490 occupancy at Ty1 and Ty1i promoters in wild type yeast and Mediator mutants. We observed ChIP  
491 signals for Mediator (Med17 and Med15) at both Ty1 and Ty1i proximal promoter regions in wild type  
492 yeast (Fig 8). In *med2Δ med3Δ med15Δ* yeast, which completely lack the tail module triad, Med17  
493 occupancy is still observed at Ty1i, while it is greatly reduced at Ty1, consistent with our northern  
494 analyses showing increased Ty1i mRNA levels in yeast lacking individual tail module triad subunits. In  
495 contrast, yeast lacking head subunits Med18 or Med20, which exhibit increased Ty1 retromobility, show  
496 reduced Mediator occupancy at the Ty1i promoter and continued occupancy at the Ty1 promoter.

497       Taken together, these findings lead us to propose a mechanism in which competition between  
498 PIC formation at the Ty1 and Ty1i promoters, governed by the Mediator complex, regulates Ty1  
499 mobility (Fig 9). As discussed earlier, the Ty1 promoter belongs to the family of TATA-containing,  
500 SAGA-regulated promoters, while Ty1i appears to fall into the category of TATA-lacking, TFIID-  
501 regulated promoters [57]. Genes whose activation depends on the Mediator tail module triad are  
502 relatively enriched for TATA-containing, SAGA-regulated family members [55]; in accordance with  
503 this observation, we propose that mutants lacking tail module triad subunits have reduced efficiency of  
504 PIC formation at the Ty1 promoter, thereby allowing increased utilization of the TATA-less Ty1i  
505 promoter. Conversely, we propose that the TATA-less Ty1i promoter depends on head and middle  
506 module subunits for Mediator association and PIC formation, consistent with our Mediator ChIP-seq  
507 results. Finally, we suggest that replacing the TATA-containing Ty1 promoter with the strong, TFIID-  
508 dependent *TEF1* promoter allows Ty1 transcription to successfully compete against the Ty1i promoter  
509 even when tail module triad subunits are deleted, so that no increase in Ty1i is observed for this reporter  
510 (Fig 5).

511 Although this model provides, in our view, a reasonable explanation for results presented here, it  
512 also illuminates gaps that remain in our understanding. First, the model and our ChIP-seq results  
513 indicate substantial Mediator occupancy at both the Ty1 and the Ty1i promoter in wild-type yeast (Fig  
514 8), despite the apparent differences in transcriptional output from these two promoters (Fig 4A).  
515 Likewise, we cannot confirm that reduced Mediator occupancy at the Ty1i promoter in *med18* $\Delta$  and  
516 *med20* $\Delta$  yeast is accompanied by reductions to Ty1i RNA or p22-Gag levels, due to their inherently low  
517 levels in the wild-type strain. One possibility to explain Mediator occupancy at the Ty1i promoter in the  
518 absence of detectable Ty1i RNA is that Ty1i RNA is substantially less stable than Ty1 RNA. Indeed,  
519 Ty1 RNA is known to be unusually stable [72,73]. A second possibility is that transcription from Ty1i is  
520 inefficient in spite of the apparent presence of Mediator at the Ty1i proximal promoter. This may be  
521 altered in Mediator head and middle module mutants, or it may be that a minor change in Ty1i RNA  
522 abundance leads to a significant change in the small population of cells that undergo transposition. It is  
523 also possible that the head and middle additionally influence other steps in the retrotransposition life  
524 cycle. For example, loss of head and middle module subunits may alter Ty1 RNA localization in such a  
525 way as to prevent retrotransposition. This possibility is supported by observed increases in  
526 ribonucleoprotein foci known as retrosomes in *med20* $\Delta$ , *med18* $\Delta$ , *med9* $\Delta$ , and *med1* $\Delta$  mutants [34].

527 Another question raised by this model is what gives rise to the postulated competition between  
528 the Ty1 and Ty1i promoters, which are about 1 kb apart. We cannot answer this question at present, but  
529 it seems likely to involve Ty1 promoter elements that are present upstream of the Ty1i proximal  
530 promoter. Ty1 possesses an unusual promoter architecture that includes transcription factor binding sites  
531 both upstream of the Ty1 TSS and sites within the ORF, but upstream of the Ty1i TSS (Fig 1C) [18].  
532 The latter region includes sites for Ste12, Tec1, Tye7, Mcm1, Rap1, and Tea1; intriguingly, Med15 has  
533 been shown to negatively regulate activation of a reporter gene by this intra-ORF region via the Mcm1  
534 site [74]. Conceivably, interaction of Mediator with this region may be sufficient to inhibit PIC

535 formation at the Ty1i proximal promoter, in a manner dependent on the tail module triad, even when the  
536 Ty1 proximal promoter is inactive, as is the case for pGTy1 $\Delta$ POL in yeast grown in glucose medium.  
537 Further work will be necessary to test the proposed promoter competition model and determine its  
538 molecular basis.

539 An unanticipated finding of this study was that an LTR-driven Ty1*his3AI* element has nearly the  
540 same retrotransposition frequency as a P<sub>TEF1</sub>-driven Ty1*his3AI* element when located on a low copy  
541 *CEN*-plasmid (Fig 5B). These frequencies are over 30 times higher than that of the active chromosomal  
542 element, Ty1*his3AI*-3114 (Fig. 2B). Moreover, Ty1*his3AI* RNA levels are only three times higher when  
543 expressed from the P<sub>TEF1</sub> promoter versus the LTR (Fig 5C). Because the promoters of chromosomal  
544 Ty1 elements have been reported to be weak, whereas the *TEF1* promoter is strong [55,59,60], we  
545 expected a marked difference in LTR-Ty1*his3AI* and P<sub>TEF1</sub>-Ty1*his3AI* retromobility. A possible  
546 explanation of these data is that the LTR promoter is more strongly repressed in the chromosome,  
547 possibly by a high level of nucleosome occupancy at the LTR that is altered on the *CEN*-plasmid  
548 [60,75]. A second possibility that could be a consequence of, or independent of, the first, is that less  
549 Ty1i RNA is expressed from the plasmid-based Ty1*his3AI* element than a chromosomal element.  
550 Indeed, Ty1i RNA expressed from LTR-Ty1*his3AI* is not detectable (Fig 5C), and the modest increases  
551 in retromobility in head and middle subunit deletion mutants carrying LTR-Ty1*his3AI* supports the idea  
552 that expression LTR-Ty1*his3AI* reduces the Ty1i/Ty1 RNA ratio (Fig 5B). Potential differences in Ty1  
553 or Ty1i RNA expression between chromosomal and plasmid elements warrants further investigation, as  
554 this might be one reason why different screens for Ty1 regulators yield largely non-overlapping gene  
555 sets [18].

556 Consistent with its role in Ty1 retromobility, Mediator also plays an important part of the host  
557 cell response to retroviruses such as HIV-1 [13,14,76]. Human Med4, and Med7 (orthologs to yeast  
558 Med4, and Med7, respectively), and Med28 (no known yeast orthologs) were identified as HIV-1

559 dependency factors [13,14]. Additionally, Med6, Med8, Med11, Med17, Med19, Med20, Med26,  
560 Med27, and Med31 (all of which have yeast orthologs of the same name with the exception of Med19,  
561 Med26, and Med27) were shown to be important activators of HIV-1 transcription [14,76]. While the  
562 evidence of Mediator's role in Ty1 TSS selection contrasts mechanistically with the role that Mediator  
563 takes in regulating HIV-1 transcription, the results presented here provide a novel mechanism by which  
564 Mediator can influence retroviral transcripts [76]. Further work is needed to determine whether other  
565 human retroviruses or retrotransposons encode internal transcripts and whether Mediator plays a role in  
566 regulating TSS selection in these elements.

567 The relationship between altered Ty1 retromobility and altered Ty1i regulation reported here and  
568 the CNC phenomenon, in which increased Ty1 copy number leads to increased Ty1i expression[22,25],  
569 remains to be explored. It will be interesting to determine the molecular mechanism underlying CNC  
570 and the specific role that promoter competition and Mediator complex plays in this phenomenon.

571

## 572 **Materials and Methods**

### 573 *Yeast Strains and Plasmids*

574 Strains used in this study are derivatives of BY4741. Genotypes of each strain are provided in S1  
575 Table. Strains containing a chromosomal *his3AI- $\Delta$ 1*-marked Ty1 element (Ty1*his3AI-3114*) were  
576 described previously [19,77]. Recombination of the *his3AI- $\Delta$ 1* allele with the *his3 $\Delta$ 1* allele present in  
577 strain BY4741 derivatives does not result in a functional *HIS3* allele. Strains containing Mediator  
578 subunit gene deletions were constructed via lithium acetate transformation with a *KanMX* allele as  
579 described [78,79].

580 Plasmid pBDG633 is a *URA3-CEN* plasmid containing a Ty1*his3AI- $\Delta$ 1* element, kindly  
581 provided by Dr. David Garfinkel [80]. Plasmid pBJC1250 is a *LEU2- CEN* vector containing a  
582 Ty1*his3AI- $\Delta$ 1* element wherein the U3 region of the 5' LTR was replaced with a *TEF1* promoter



583 (herein referred to as  $P_{TEFI}$ -Ty1 $his3AI$ ; see Fig 5). Plasmid pBJC80, herein referred to as pGTy1 $\Delta$ POL,  
584 has been described previously [64].

585

#### 586 *Transposition Frequency Assay*

587 Ty1 mobility was determined as previously described [19]. Individual colonies from strains were  
588 grown in triplicate in liquid YPD at 30°C overnight. Each culture was then diluted in quadruplicate by a  
589 factor of 1000 in YPD broth and grown at 20°C to an optical density beyond log growth phase. 1 $\mu$ L of a  
590 1:1000 dilution of each of the resulting 12 cultures was plated on YPD agar to provide an accurate  
591 representation of the cell density. In parallel, 100 $\mu$ L to 1mL of each culture was plated on SC-HIS agar.  
592 All plates were grown at 30°C for 3-4 days. Mobility frequency was calculated as a ratio of the number  
593 of HIS<sup>+</sup> colony forming units to the number of colony forming units in each culture as represented by  
594 the number of colonies growing on YPD agar. For strains for which no HIS<sup>+</sup> prototrophs were observed,  
595 mobility was reported as an upper limit equal to the ratio of (1/the total number of colony forming units  
596 in all three biological replicates).

597 For strains containing a plasmid, the above protocol was modified such that cultures were grown  
598 in their respective selective media (SC-URA, or SC-LEU) at 30°C until confluent, diluted 1:1000 and  
599 grown at 20°C in YPD until confluent, and plated on their respective dropout media (SC-URA, or SC-  
600 LEU) as well as the corresponding media lacking histidine (SC-URA-HIS or SC-LEU-HIS).

601

#### 602 *RNA Purification*

603 Cells were grown in YPD broth at 20°C to mid-log phase. Total cellular RNA was extracted  
604 using a hot phenol/chloroform extraction protocol [81]. PolyA<sup>+</sup> RNA was purified from 250 $\mu$ g to 1mg  
605 of total cellular RNA using the Magnetic mRNA Isolation Kit (New England Biolabs) following the  
606 manufacturer's protocol.

607

608 *Northern Blot*

609 A 20µg aliquot of total cellular RNA was separated on a 1% Seakem GTG agarose gel as  
610 previously described [82]. Three to six µg of poly A<sup>+</sup> RNA was separated on an 0.8% Seakem GTG  
611 agarose gel as previously described [82]. Separated RNA was transferred to a Hybond XL membrane  
612 (GE Healthcare) using a gradient of 6X SSC to 10X SSC overnight at room temperature. Synthesis of  
613 <sup>32</sup>P-labeled RNA riboprobes was carried out in vitro using SP6 or T7 polymerase (New England  
614 Biolabs). Membranes were incubated with probes in NorthernMax PreHyb Buffer (Ambion) at 65°C  
615 overnight. Images were scanned using a Typhoon 9400 scanner, and quantified using ImageQuant  
616 software (Molecular Dynamics, Sunnyvale, CA).

617

618 *Western Blot*

619 Cultures were grown at 20°C in YPD for one cell doubling (OD<sub>600</sub> 0.3 to OD<sub>600</sub> 0.6) after  
620 dilution from overnight cultures grown at 30°C. Protein was extracted from total cell lysates as  
621 previously described [83] and resolved on a 10% SDS-PAGE gel. When resolving p18- and p22-Gag, a  
622 15% SDS-PAGE gel was used. Protein was then transferred to a polyvinylidene difluoride (PVDF)  
623 membrane. Membranes were blocked in a 5% nonfat milk solution dissolved in phosphate buffered  
624 saline (PBS) with 0.1% TWEEN 20. Membranes were then incubated in 0.5% nonfat milk in PBS with  
625 0.1% TWEEN 20 with a 1:7500 dilution of affinity-purified anti-VLP antisera [50] to detect p49-Gag, a  
626 1:5000 dilution of a polyclonal antibody specific to p18-Gag (a gift from David Garfinkel, described in  
627 [25]), a 1:7500 dilution of anti GAPDH monoclonal antibody (Thermo Fisher Scientific), or a 1:5000  
628 dilution of anti actin monoclonal antibody (Abcam). Membranes were subsequently incubated with  
629 horseradish peroxidase (HRP)-conjugated secondary antibodies (Millipore). Following terminal washes,  
630 membranes were incubated with SuperSignal West Pico chemiluminescence substrate (Pierce, Thermo

631 Fisher Scientific), and exposed to film (Kodak). Antibody was stripped from membranes as described  
632 previously [84]. Images were developed on film using a Model SRX-101A Medical Scanner (Konica  
633 Minolta) and scanned using a Cannon MP480 scanner. Protein bands were quantified using ImageJ  
634 (NIH).

635

#### 636 *Southern Blot*

637 Cultures were grown past log growth phase at 20°C in YPD broth. Total genomic DNA was  
638 isolated as previously described [15,85], and digested with *Sph I* endonuclease. Digested genomic DNA  
639 was then fractionated by gel electrophoresis on a 1% GTG agarose gel and subjected to Southern blot  
640 analysis with a <sup>32</sup>P-labeled riboprobe specific for *POL* as described previously [15,31].

641

#### 642 *cDNA Synthesis*

643 Polyadenylated RNA was used to synthesize cDNA using the First Strand cDNA Synthesis Kit  
644 (Affymetrix). 100ng of polyA<sup>+</sup> mRNA was used per reaction, as were 0.5μM concentration each of  
645 primers specific to the  $\Delta$ *POL* region of pGTy1 $\Delta$ *POL* (5'-  
646 CCACCCATAATGTAATAGATCTATCGATTCTAGAC-3') and to *ACT1* (5'-  
647 ATCGTCCCAGTTGGTGACAATACC-3'). Reactions were performed according to manufacturer  
648 protocols, and run at 44°C for 1 hour, followed by incubation at 92°C for 10 minutes. For comparison of  
649 levels of full-length Ty1 and Ty1i transcripts generated from pGTy1 $\Delta$ *POL* (Fig 7), cDNA was PCR  
650 amplified using primers binding 250 bp upstream of the Ty1i TSS (5'-  
651 GATTCATCCTCAGCGGACTCTG-3'), or 250 bp downstream of Ty1i TSS (5'-  
652 AGAAGAATGATTCTCGCAGC-3'), and the  $\Delta$ *POL* region of the element (5'-  
653 CCACCCATAATGTAATAGATCTATCGATTCTAGAC-3'). PCR product was isolated at different  
654 cycle numbers and compared with amplification of *ACT1* (forward primer: 5'-

655 GGTCTGGTATGTGTAAAGCCGGT-3'; reverse primer: 5'-ATCGTCCCAGTTGGTGACAATACC-  
656 3') to control for relative cDNA abundance.

657

### 658 *ChIP-seq*

659 For analysis of Mediator occupancy at Ty1 elements (Fig 8), chromatin immunoprecipitation  
660 followed by high throughput sequencing (ChIP-seq) was performed using strains in which Mediator  
661 subunits Med15 or Med17 carried 13-myc epitope tags and which were engineered to allow Kin28  
662 inactivation by the anchor away technique (S1 Table) [65]. For anchor away experiments, yeast were  
663 grown in YPD to an OD<sub>600</sub> of 0.8. Rapamycin was then added to a concentration of 1 µg/mL (from a 1  
664 mg/mL stock in ethanol stored at -20°C for not more than one month) and cultures allowed to grow one  
665 hr at 30°C prior to cross-linking. ChIP against epitope-tagged Mediator subunits was carried out as  
666 described previously [56], using 2 µg of anti-myc antibody (clone 9E10, Sigma) and protein G  
667 sepharose beads for capture (GE Healthcare). Library preparation for Illumina sequencing was  
668 performed using the NEBNext Ultra II library preparation kit (New England Biolabs) according to  
669 manufacturer's directions. Libraries were bar-coded using NEXTflex barcodes (BIOO Scientific) and  
670 sequenced on the Illumina NextSeq platform at the Wadsworth Center, New York State Department of  
671 Health.

672 Unfiltered paired-end sequencing reads were aligned to the *S. cerevisiae* reference genome  
673 (Sacc3) by using BWA [86]. Up to one mismatch was allowed for each aligned read; reads mapping to  
674 multiple locations were retained and randomly assigned. Duplicate reads were removed based on paired  
675 end information. Occupancy profiles for Ty1 elements were generated by averaging the signal of all the  
676 31 Ty1 elements. The occupancy is plotted on the window from 2kb upstream of TSS to 2kb  
677 downstream of TES (Fig 4 & 8). In each Ty1 element ORF, from TSS+1kb to TES-1kb, the region is

678 divided into 100 bins and the average occupancy of each bin was calculated. For the flanking regions,  
679 the occupancy was calculated for each base pair.

680

### 681 *Data Deposition*

682 ChIP-seq data has been deposited in Arrayexpress under accession number E-MTAB-5824. Data  
683 used in Figure 4B is available from the NCBI Sequence Read Archive under accession number  
684 SRP047524.

685

### 686 **Acknowledgements**

687 We thank Todd Benziger for help with strain construction, and David Garfinkel, PhD (University  
688 of Georgia, Athens, Georgia, USA) for the donation of the anti-p18 antibody and helpful advice on its  
689 use. Additionally, we thank the Wadsworth Center Media and Tissue Culture Core and Applied  
690 Genomic Technologies Core facilities.

691

692

### 693 **References**

- 694 1. Curcio MJ, Derbyshire KM. The outs and ins of transposition: from mu to kangaroo. *Nat Rev*  
695 *Mol Cell Biol.* 2003;4(11):865–77.
- 696 2. Gogvadze E, Buzdin A. Retroelements and their impact on genome evolution and functioning.  
697 *Cell Mol Life Sci.* 2009;66(23):3727–42.
- 698 3. Biémont C. A brief history of the status of transposable elements: From junk DNA to major  
699 players in evolution. *Genetics.* 2010;18(4):1085–93.
- 700 4. Ivancevic AM, Kortschak RD, Bertozzi T, Adelson DL. LINEs between Species: Evolutionary  
701 Dynamics of LINE-1 Retrotransposons across the Eukaryotic Tree of Life. *Genome Biol Evol.*  
702 2016;8(11):3301–22.
- 703 5. Kazazian HH. Mobile Elements: Drivers of Genome Evolution. *Science.* 2004;303(5664):1626–  
704 32.
- 705 6. Hancks DC, Kazazian HH. Roles for retrotransposon insertions in human disease. *Mob DNA.*  
706 2016;7:9.
- 707 7. Papatirou I, Pantopikou K, Apostolou P. L1 retrotransposon expression in circulating tumor  
708 cells. *PLoS One.* 2017;12(2):e0171466.
- 709 8. Scott EC, Gardner EJ, Masood A, Chuang NT, Vertino PM, Devine SE. A hot L1 retrotransposon  
710 evades somatic repression and initiates human colorectal cancer. *Genome Res.* 2016;26(6):745–  
711 55.
- 712 9. Malik HS, Henikoff S, Eickbush TH. Poised for Contagion: Evolutionary Origins of the

- 713 Infectious Abilities of Invertebrate Retroviruses. *Genome Res.* 2000;10(9):1307–18.
- 714 10. Irwin B, Aye M, Baldi P, Beliakova-Bethell N, Cheng H, Dou Y, et al. Retroviruses and yeast  
715 retrotransposons use overlapping sets of host genes. *Genome Res.* 2005;15(5):641–54.
- 716 11. Dutko JA, Schäfer A, Kenny A, Cullen BR, Curcio MJ. Inhibition of a Yeast LTR  
717 Retrotransposon by Human APOBEC3 Cytidine Deaminases. *Curr Biol.* 2005;15(7):661–6.
- 718 12. Maxwell PH, Curcio MJ. Host Factors That Control Long Terminal Repeat Retrotransposons in  
719 *Saccharomyces cerevisiae*: Implications for Regulation of Mammalian Retroviruses. *Eukaryot*  
720 *Cell.* 2007 Jul;6(7):1069–80.
- 721 13. Brass AL, Dykxhoorn DM, Benita Y, Yan N, Engelman A, Xavier RJ, et al. Identification of host  
722 proteins required for HIV infection through a functional genomic screen. *Science*  
723 2008;319(5865):921–6.
- 724 14. Zhou H, Xu M, Huang Q, Gates AT, Zhang XD, Castle JC, et al. Genome-Scale RNAi Screen for  
725 Host Factors Required for HIV Replication. *Cell Host Microbe.* 2008;4(5):495–504.
- 726 15. Dutko JA, Kenny AE, Gamache ER, Curcio MJ. 5' to 3' mRNA decay factors colocalize with  
727 Ty1 gag and human APOBEC3G and promote Ty1 retrotransposition. *J Virol.* 2010;84(10):5052–  
728 66.
- 729 16. Checkley MA, Mitchell JA, Eizenstat LD, Lockett SJ, Garfinkel DJ. Ty1 gag enhances the  
730 stability and nuclear export of Ty1 mRNA. *Traffic.* 2013;14(1):57–69.
- 731 17. Okada A, Iwatani Y. APOBEC3G-Mediated G-to-A Hypermutation of the HIV-1 Genome: The  
732 Missing Link in Antiviral Molecular Mechanisms. *Front Microbiol.* 2016;7:2027.
- 733 18. Curcio MJ, Lesage P, Lutz S. The Ty1 LTR-Retrotransposon of Budding Yeast, *Saccharomyces*  
734 *cerevisiae*. *Microbiol Spectr.* 2015;3(2):1-35.
- 735 19. Curcio MJ, Garfinkel DJ. Single-step selection for Ty1 element retrotransposition. *Proc Natl*  
736 *Acad Sci U S A.* 1991;88(3):936–40.
- 737 20. Kenna MA, Baker Brachmann C, Devine SE, Boeke JD. Invading the Yeast Nucleus: a Nuclear  
738 Localization Signal at the C Terminus of Ty1 Integrase Is Required for Transposition In Vivo.  
739 *Mol Cell Biol.* 1998;18(2):1115–24.
- 740 21. Moore SP, Rinckel LA, Garfinkel DJ. A Ty1 Integrase Nuclear Localization Signal Required for  
741 Retrotransposition. *Mol Cell Biol.* 1998;18(2):1105–14.
- 742 22. Garfinkel DJ, Tucker JM, Saha A, Nishida Y, Pachulska-Wieczorek K, Błaszczuk L, et al. A self-  
743 encoded capsid derivative restricts Ty1 retrotransposition in *Saccharomyces*. *Curr Genet.*  
744 2016;62(2):321–9.
- 745 23. Garfinkel DJ, Nyswaner K, Wang J, Cho J-Y. Post-transcriptional Cosuppression of Ty1  
746 Retrotransposition. *Genetics.* 2003;165(1):83–99.
- 747 24. Matsuda E, Garfinkel DJ. Posttranslational interference of Ty1 retrotransposition by antisense  
748 RNAs. *Proc Natl Acad Sci U S A.* 2009;106(37):15657–62.
- 749 25. Saha A, Mitchell JA, Nishida Y, Hildreth JE, Ariberre JA, Gilbert W V., et al. A trans-Dominant  
750 Form of Gag Restricts Ty1 Retrotransposition and Mediates Copy Number Control. *J Virol.*  
751 2015;89(7):3922–38.
- 752 26. Nishida Y, Pachulska-Wieczorek K, Błaszczuk L, Saha A, Gumna J, Garfinkel DJ, et al. Ty1  
753 retrovirus-like element Gag contains overlapping restriction factor and nucleic acid chaperone  
754 functions. *Nucleic Acids Res.* 2015;43(15):7414–7431.
- 755 27. Tucker JM, Larango ME, Wachsmuth LP, Kannan N, Garfinkel DJ. The Ty1 Retrotransposon  
756 Restriction Factor p22 Targets Gag. *PLoS Genet.* 2015;11(10):e1005571.
- 757 28. Tucker JM, Garfinkel DJ. Ty1 escapes restriction by the self-encoded factor p22 through  
758 mutations in capsid. *Mob Genet Elements.* 2016;6(2):e1154639.
- 759 29. Berretta J, Pinskaya M, Morillon A. A cryptic unstable transcript mediates transcriptional trans -  
760 silencing of the Ty1 retrotransposon in *S. cerevisiae*. *Genes Dev.* 2008;22(5):615–26.

- 761 30. Suresh S, Ahn HW, Joshi K, Dakshinamurthy A, Kananganat A, Garfinkel DJ, et al. Ribosomal  
762 protein and biogenesis factors affect multiple steps during movement of the *Saccharomyces*  
763 *cerevisiae* Ty1 retrotransposon. *Mob DNA*. 2015;6:22.
- 764 31. Scholes DT, Banerjee M, Bowen B, Curcio MJ. Multiple Regulators of Ty1 Transposition in  
765 *Saccharomyces cerevisiae* Have Conserved Roles in Genome Maintenance. *Genetics*. 2001  
766 Dec;159(4):1449–65.
- 767 32. Griffith JL, Coleman LE, Raymond AS, Goodson SG, Pittard WS, Tsui C, et al. Functional  
768 Genomics Reveals Relationships Between the Retrovirus-Like Ty1 Element and Its Host  
769 *Saccharomyces cerevisiae*. *Genetics*. 2003 Jul;164(3):867–79.
- 770 33. Curcio MJ, Kenny AE, Moore S, Garfinkel DJ, Weintraub M, Gamache ER, et al. S-phase  
771 checkpoint pathways stimulate the mobility of the retrovirus-like transposon Ty1. *Mol Cell Biol*.  
772 2007 Dec;27(24):8874–85.
- 773 34. Malagon F, Jensen TH. The T Body, a New Cytoplasmic RNA Granule in *Saccharomyces*  
774 *cerevisiae*. *Mol Cell Biol*. 2008;28(19):6022–32.
- 775 35. Nyswaner KM, Checkley MA, Yi M, Stephens RM, Garfinkel DJ. Chromatin-Associated Genes  
776 Protect the Yeast Genome From Ty1 Insertional Mutagenesis. *Genetics*. 2008;178(1):197–214.
- 777 36. Dakshinamurthy A, Nyswaner KM, Farabaugh PJ, Garfinkel DJ. BUD22 Affects Ty1  
778 Retrotransposition and Ribosome Biogenesis in *Saccharomyces cerevisiae*. *Genetics*.  
779 2010;185(4):1193–205.
- 780 37. Tsai K-L, Tomomori-Sato C, Sato S, Conaway RC, Conaway JW, Asturias FJ. Subunit  
781 Architecture and Functional Modular Rearrangements of the Transcriptional Mediator Complex.  
782 *Cell*. 2014;157(6):1430–44.
- 783 38. Wang X, Sun Q, Ding Z, Ji J, Wang J, Kong X, et al. Redefining the modular organization of the  
784 core Mediator complex. *Cell Res*. 2014;24(7):796–808.
- 785 39. Robinson PJ, Trnka MJ, Pellarin R, Greenberg CH, Bushnell DA, Davis R, et al. Molecular  
786 architecture of the yeast Mediator complex. *Elife*. 2015;4:e08719.
- 787 40. Plaschka C, Nozawa K, Cramer P. Mediator Architecture and RNA Polymerase II Interaction. *J*  
788 *Mol Biol*. 2016;428(12):2569–74.
- 789 41. van de Peppel J, Kettelarij N, van Bakel H, Kockelkorn TTJP, van Leenen D, Holstege FCP.  
790 Mediator Expression Profiling Epistasis Reveals a Signal Transduction Pathway with  
791 Antagonistic Submodules and Highly Specific Downstream Targets. *Mol Cell*. 2005  
792 19;19(4):511–22.
- 793 42. Ansari SA, Morse RH. Cellular and Molecular Life Sciences Mechanisms of Mediator complex  
794 action in transcriptional activation. *Cell Mol Life Sci*. 2013;70(15):2743–56.
- 795 43. Allen BL, Taatjes DJ. The Mediator complex: a central integrator of transcription. *Nat Rev Mol*  
796 *Cell Bol*. 2015;16(3):155–66.
- 797 44. Kornberg RD. Mediator and the mechanism of transcriptional activation. *Trends Biochem Sci*.  
798 2005;30(5):235–9.
- 799 45. Esnault C, Ghavi-Helm Y, Brun S, Soutourina J, Van Berkum N, Boschiero C, et al. Mediator-  
800 Dependent Recruitment of TFIIH Modules in Preinitiation Complex. *Mol Cell*. 2008;31(3):337–  
801 46.
- 802 46. Ansari SA, He Q, Morse RH. Mediator complex association with constitutively transcribed genes  
803 in yeast. *Proc Natl Acad Sci U S A*. 2009;106(39):16734–9.
- 804 47. Robinson PJ, Trnka MJ, Bushnell DA, Davis RE, Mattei P-J, Burlingame AL, et al. Structure of a  
805 Complete Mediator-RNA Polymerase II Pre-Initiation Complex. *Cell*. 2016;166(6):1411–22.
- 806 48. Grünberg S, Henikoff S, Hahn S, Zentner GE. Mediator binding to UASs is broadly uncoupled  
807 from transcription and cooperative with TFIID recruitment to promoters. *EMBO J*.  
808 2016;35(22):2435–46.

- 809 49. Jeronimo C, Langelier MF, Bataille AR, Pascal JM, Pugh BF, Robert F. Tail and Kinase Modules  
810 Differently Regulate Core Mediator Recruitment and Function In Vivo. *Mol Cell*.  
811 2016;64(3):455–66.
- 812 50. Risler JK, Kenny AE, Palumbo RJ, Gamache ER, Curcio MJ. Host co-factors of the retrovirus-  
813 like transposon Ty1. *Mob DNA*. 2012;3(1):12.
- 814 51. Winston F, Durbin KJ, Fink GR. The SPT3 gene is required for normal transcription of Ty  
815 elements in *S. cerevisiae*. *Cell*. 1984;39(3):675–82.
- 816 52. Boeke JD, Styles CA, Fink GR. *Saccharomyces cerevisiae* SPT3 gene is required for  
817 transposition and transpositional recombination of chromosomal Ty elements. *Mol Cell Biol*.  
818 1986;6(11):3575–81.
- 819 53. Zhang F, Sumibcay L, Hinnebusch AG, Swanson MJ. A Triad of Subunits from the Gal11/Tail  
820 Domain of Srb Mediator Is an In Vivo Target of Transcriptional Activator Gcn4p. *Mol Cell Biol*.  
821 2004;24(15):6871–86.
- 822 54. Myers LC, Gustafsson CM, Hayashibara KC, Brown PO, Kornberg RD. Mediator protein  
823 mutations that selectively abolish activated transcription. *Proc Natl Acad Sci U S A*.  
824 1999;96(1):67–72.
- 825 55. Ansari SA, Ganapathi M, Benschop JJ, Holstege FCP, Wade JT, Morse RH. Distinct role of  
826 Mediator tail module in regulation of SAGA-dependent, TATA-containing genes in yeast. *EMBO*  
827 *J*. 2012;31(1):44–57.
- 828 56. Paul E, Zhu ZI, Landsman D, Morse RH. Genome-Wide Association of Mediator and RNA  
829 Polymerase II in Wild-Type and Mediator Mutant Yeast. *Mol Cell Biol*. 2015;35(1):331–42.
- 830 57. Basehoar AD, Zanton SJ, Pugh BF. Identification and Distinct Regulation of Yeast TATA Box-  
831 Containing Genes. *Cell*. 2004;116(6):699–709.
- 832 58. Huisinga KL, Pugh BF. A Genome-Wide Housekeeping Role for TFIID and a Highly Regulated  
833 Stress-Related Role for SAGA in *Saccharomyces cerevisiae*. *Mol Cell*. 2004;13(4):573–85.
- 834 59. Kemmeren P, Sameith K, van de Pasch LAL, Benschop JJ, Lenstra TL, Margaritis T, et al. Large-  
835 Scale Genetic Perturbations Reveal Regulatory Networks and An Abundance of Gene-Specific  
836 Repressors. *Cell*. 2014;157(3):740–52.
- 837 60. Morillon A, Bénard L, Springer M, Lesage P. Differential effects of chromatin and Gcn4 on the  
838 50-fold range of expression among individual yeast Ty1 retrotransposons. *Mol Cell Biol*.  
839 2002;22(7):2078–88.
- 840 61. Prescott EM, Proudfoot NJ. Transcriptional collision between convergent genes in budding yeast.  
841 *Proc Natl Acad Sci U S A*. 2002;99(13):8796–801.
- 842 62. Martens JA, Laprade L, Winston F. Intergenic transcription is required to repress the  
843 *Saccharomyces cerevisiae* SER3 gene. *Nature*. 2004;429(6991):571–4.
- 844 63. Dang Y, Cheng J, Sun X, Zhou Z, Liu Y. Antisense transcription licenses nascent transcripts to  
845 mediate transcriptional gene silencing. *Genes Dev*. 2016;30(21):2417–32.
- 846 64. Curcio MJ, Garfinkel DJ. Heterogenous Functional Ty1 Elements Are Abundant in the  
847 *Saccharomyces cerevisiae* Genome. *Genetics*. 1994;136:1245–59.
- 848 65. Haruki H, Nishikawa J, Laemmli UK. The Anchor-Away Technique: Rapid, Conditional  
849 Establishment of Yeast Mutant Phenotypes. *Mol Cell*. 2008;31(6):925–32.
- 850 66. Wong KH, Jin Y, Struhl K. TFIID Phosphorylation of the Pol II CTD Stimulates Mediator  
851 Dissociation from the Preinitiation Complex and Promoter Escape. *Mol Cell*. 2014;54(4):601–12.
- 852 67. Jeronimo C, Robert F. Kin28 regulates the transient association of Mediator with core promoters.  
853 *Nat Struct Mol Biol*. 2014;21(5):449–55.
- 854 68. Persson J, Steglich B, Smialowska A, Boyd M, Bornholdt J, Andersson R, et al. Regulating  
855 retrotransposon activity through the use of alternative transcription start sites. *EMBO Rep*.  
856 2016;17(5):753–68.



- 857 69. Miller C, Matic I, Maier KC, Schwalb B, Roether S, Strässer K, et al. Mediator Phosphorylation  
858 Prevents Stress Response Transcription During Non-Stress Conditions. *J Biol Chem.*  
859 2012;287(53):44017–26.
- 860 70. Larivière L, Seizl M, van Wageningen S, Röther S, van de Pasch L, Feldmann H, et al.  
861 Structure–system correlation identifies a gene regulatory Mediator submodule. *Genes Dev.*  
862 2008;22(7):872–7.
- 863 71. Tsai K-L, Sato S, Tomomori-Sato C, Conaway RC, Conaway JW, Asturias FJ. A conserved  
864 Mediator-CDK8 kinase module association regulates Mediator-RNA polymerase II interaction.  
865 *Nat Struct Mol Biol.* 2013;20(5):611–9.
- 866 72. Munchel SE, Shultzaberger RK, Takizawa N, Weis K. Dynamic profiling of mRNA turnover  
867 reveals gene-specific and system-wide regulation of mRNA decay. *Mol Biol Cell.*  
868 2011;22(15):2787–95.
- 869 73. Huang Q, Purzycka KJ, Lusvarghi S, Li D, Legrice SFJ, Boeke JD. Retrotransposon Ty1 RNA  
870 contains a 5'-terminal long-range pseudoknot required for efficient reverse transcription. *RNA.*  
871 2013;19(3):320–32.
- 872 74. Yu G, Fassler JS. Spt13 (Gal11) of *Saccharomyces cerevisiae* Negatively Regulates Activity of  
873 the MCM1 Transcription Factor in Ty1 Elements. *Mol Cell Biol.* 1993;13(1):63–71.
- 874 75. Servant G, Pennetier C, Lesage P. Remodeling Yeast Gene Transcription by Activating the Ty1  
875 Long Terminal Repeat Retrotransposon under Severe Adenine Deficiency. *Mol Cell Biol.*  
876 2008;28(17):5543–54.
- 877 76. Ruiz A, Pauls E, Badia R, Riveira-Muñoz E, Clotet B, Ballana E, et al. Characterization of the  
878 Influence of Mediator Complex in HIV-1 Transcription. *J Biol Chem.* 2014;289(40):27665–  
879 27676.
- 880 77. Mou Z, Kenny AE, Curcio MJ. Hos2 and Set3 Promote Integration of Ty1 Retrotransposons at  
881 tRNA Genes in *Saccharomyces cerevisiae*. *Genetics.* 2006;172(4):2157–67.
- 882 78. Brachmann CB, Davies A, Cost GJ, Caputo E, Li J, Hieter P, et al. Designer deletion strains  
883 derived from *Saccharomyces cerevisiae* S288C: A useful set of strains and plasmids for PCR-  
884 mediated gene disruption and other applications. *Yeast.* 1998;14(2):115–32.
- 885 79. Winzeler EA, Shoemaker DD, Astromoff A, Liang H, Anderson K, Andre B, et al. Functional  
886 Characterization of the *S. cerevisiae* Genome by Gene Deletion and Parallel Analysis. *Science*  
887 1999;285(5429):901–6.
- 888 80. Lee B-S, Lichtenstein CP, Faiola B, Rinckel LA, Wysock W, Curcio MJ, et al. Posttranslational  
889 Inhibition of Ty1 Retrotransposition by Nucleotide Excision Repair/Transcription Factor TFIIF  
890 Subunits Ssl2p and Rad3p. *Genetics.* 1998;148(4):1743–61.
- 891 81. Schmitt ME, Brown TA, Trumppower BL. A rapid and simple method for preparation of RNA  
892 from *Saccharomyces cerevisiae*. *Nucleic Acids Res.* 1990;18(10):3091–2.
- 893 82. Maxwell PH, Coombes C, Kenny AE, Lawler JF, Boeke JD, Curcio MJ. Ty1 Mobilizes  
894 Subtelomeric Y' Elements in Telomerase-Negative *Saccharomyces cerevisiae* Survivors. *Mol*  
895 *Cell Biol.* 2004;24(22):9887–98.
- 896 83. Kushnirov V V. Rapid and reliable protein extraction from yeast. *Yeast.* 2000;16(9):857–60.
- 897 84. Doh JH, Lutz S, Curcio MJ. Co-translational Localization of an LTR-Retrotransposon RNA to the  
898 Endoplasmic Reticulum Nucleates Virus-Like Particle Assembly Sites. *PLoS Genet.*  
899 2014;10(3):e1004219.
- 900 85. Conte Jr. D, Barber E, Banerjee M, Garfinkel DJ, Curcio MJ. Posttranslational regulation of Ty1  
901 retrotransposition by mitogen- activated protein kinase Fus3. *Mol Cell Biol.* 1998;18(5):2502–13.
- 902 86. Seoighe C, Wolfe KH. Updated map of duplicated regions in the yeast genome. *Gene.*  
903 1999;238(1):253–61.
- 904

905

906 **Figure Legends**

907

908 **Fig 1: The Ty1 retrotransposon lifecycle and transcriptional regulation (adapted from [18]).** (A)

909 The Ty1 mobility lifecycle. Following transcription, Ty1 RNA is exported to the cytoplasm where it is  
910 localizes co-translationally to a microscopically distinct cytoplasmic focus known as the retrosome. The  
911 retrosome is the site of assembly of the VLPs, which serve as the sites for Ty1 protein maturation and  
912 reverse transcription of Ty1 cDNA. Ty1 cDNA is then transported back into the nucleus and integrated  
913 into the host genome. (B) Ty1 contains two ORFs (*GAG* and *POL*) flanked by a 5' and a 3' LTR. Ty is  
914 transcribed from the 5' untranslated region (R-U5) in the 5' LTR, and it terminates within the 3' LTR. In  
915 addition to the primary Ty1 transcript, the Ty1i transcript initiates within the *GAG* ORF to produce a 5.0  
916 kb truncated transcript. Antisense (AS) RNA is also transcribed from within the *GAG* ORF to the 5'  
917 LTR. (C) The Ty1 5' LTR as well as the first 1 kb of the *GAG* ORF contain numerous transcription  
918 factor binding sites, as well as two TATA elements (T1 and T2). The transcription termination sites in  
919 the 3' LTR (TS1 and TS2) are located in the R-U5 region.

920

921 **Fig 2: Mediator subunit deletions influence Ty1 mobility in a module-specific manner.** (A) The  
922 Mediator transcriptional coactivator complex is composed of head (red), middle (blue), tail (yellow), and  
923 kinase (grey) modules (figure adapted from [37]). Individual subunits investigated in this study are  
924 labeled. (B) The frequency of retrotransposition of the chromosomal *Ty1his3AI-3114* element was  
925 measured in congenic WT, *spt3Δ* and Mediator subunit deletion strains that each lack an individual,  
926 non-essential Mediator subunit. Error bars represent standard deviation for three biological replicates.  
927 Asterisks denote values that represent upper limit retrotransposition estimates in strains with no  
928 retrotransposition events among the total number of cells assayed. Bars are color-coded to match  
929 structural organization as shown in (A).

930

931 **Fig 3: Mediator subunits influence Ty1 cDNA levels without altering levels of Ty1 RNA or Gag**  
932 **protein.** (A) Quantitative northern blot analysis of sense-strand (Ty1) and antisense-strand (Ty1 AS)  
933 RNA. Northern membranes were probed for Ty1 AS RNA, followed by stripping and probing for Ty1  
934 RNA using strand-specific riboprobes, and for 18S rRNA as a loading control. Image quantification is  
935 representative of two biological replicates. The graph on the right shows the quantitation of Ty1 RNA  
936 and Ty1 AS RNA levels, each relative to the 18S subunit rRNA level. (B) Western blot of total cell  
937 lysates probed for Gag using anti-VLP antibodies. Asterisks indicate values derived from two biological  
938 replicates. All other values represent those measured from three biological replicates. (C) Quantitative  
939 Southern blot analysis to determine the level of unintegrated Ty1 cDNA (cDNA) relative to the amount  
940 of DNA in bands representing two genomic Ty1 elements (G1 and G2). Image quantification is  
941 representative of three biological replicates, only one of which is shown. All experiments were  
942 performed using congenic WT, *spt3Δ* and Mediator subunit deletion strains harboring *Ty1his3AI-3114*.  
943 Bars are color coded as in Figure 2.

944  
945 **Fig 4: Deletion of the Mediator tail increases polyA<sup>+</sup> Ty1i RNA and p22-Gag translation.** (A)  
946 Northern blot probed for Ty1, Ty1i and *PYK1* RNA, the latter as a loading control. Image is  
947 representative of three biological replicates. Quantification of Ty1 or Ty1i RNA relative to *PYK1* RNA  
948 is an average of three biological replicates, unless marked with an asterisk, which denotes two biological  
949 replicates. (B) Pol II occupancy in the first 1kb of the Ty1 element is reduced in *med3Δ med15Δ* yeast.  
950 ChIP-seq data from [56] was analyzed to obtain Pol II occupancy averaged over all 31 genomic Ty1  
951 elements. (C) Western blot of total cell lysate measuring levels of p22- and p18-Gag relative to the  
952 loading control, GAPDH. The p22-Gag and p18-Gag were measured using p22-polyclonal antibody.  
953 Image is representative of three biological replicates, and quantitation is the average ratio of p22-Gag or  
954 p18-Gag to GAPDH signal from three biological replicates of each strain. In panels (A) and (C),

955 quantitation was performed on RNA or protein samples from the WT strain and congenic *spt3Δ* strain as  
956 a negative control (grey bars), Mediator head subunit gene deletion strains (red bars), middle subunit  
957 gene deletion strains (blue bars) and tail subunit gene deletion strains (yellow bars).

958

959 **Fig 5: The Mediator tail acts on Ty1 mobility in an LTR promoter-dependent manner. (A)**

960 Schematic of the  $P_{TEF1}$ -Ty1*his3AI* element relative to a Ty1*his3AI* element with the standard LTR  
961 promoter.  $P_{TEF1}$ -Ty1*his3AI* has a *TEF1* promoter in place of Ty1 promoter elements in the U3 region of  
962 the 5' LTR (See Fig 1C).  $P_{TEF1}$ -Ty1*his3AI* retains the Ty1 TSS and R-U5 region of the 5' LTR. (B)  
963 Retrotransposition frequency for a plasmid-based  $P_{TEF1}$ -Ty1*his3AI* (right) or LTRTy1*his3AI* (left)  
964 element in the WT and *spt3Δ* negative control strains (grey bars), Mediator head subunit gene deletion  
965 strains (red bars), middle subunit gene deletion strains (blue bars) and tail subunit gene deletion strains  
966 (yellow bars). Retrotransposition frequency is derived from three biological replicates. Asterisks denote  
967 values that represent upper limit mobility estimates in strains that had no His<sup>+</sup> prototrophs per total  
968 number of Ura<sup>+</sup> or Leu<sup>+</sup> cells analyzed. (C) Northern blot performed using 6 μg of polyA<sup>+</sup> RNA from  
969 strains containing a plasmid-based *his3AI*-marked Ty1 under control of the native promoter  
970 (LTRTy1*his3AI*) or the *TEF1* promoter ( $P_{TEF1}$ -Ty1*his3AI*). The blot was probed with a sense-strand  
971 *HIS3* riboprobe to detect Ty1*his3AI* and Ty1*his3AI* RNA. All lanes shown are from a single gel. The  
972 values reported in the graph are the average ratio of Ty1*his3AI* RNA relative to *PYK1* RNA in two  
973 biological replicates. Bars are color-coded as in (B).

974

975 **Fig 6: Internal Ty1iΔPOL transcript is expressed at higher levels than full-length Ty1ΔPOL RNA**  
976 **from pGTy1ΔPOL in yeast grown in glucose medium.** Top: Schematic of the *GALI*:Ty1ΔPOL  
977 cassette in pGTy1ΔPOL showing forward primer locations for detection of Ty1 RNA (blue) versus Ty1i  
978 RNA (red). Both amplifications utilized the same reverse primer (purple), that crosses the deletion

979 junction and contains sequences unique to the pGTy1 $\Delta$ POL element. A reverse primer specific for  
980 ACT1 was also used to synthesize cDNA used as a template for the PCR amplification. No PCR product  
981 was detected using the  $\Delta$ POL reverse primer when RNA from yeast lacking pGTy1 $\Delta$ POL was used as  
982 template (data not shown). Bottom: Reverse Transcription-PCR reactions using polyA<sup>+</sup> RNA isolated  
983 from strains of the indicated genotype bearing plasmid pGTy1 $\Delta$ POL, and grown in glucose-containing  
984 broth. Aliquots were taken from reactions at the indicated number of cycles and analyzed by agarose gel  
985 electrophoresis. RT-PCR amplification products of Ty1, Ty1i, and ACT1 RNA are indicated. The same  
986 WT samples were used for all panels; results were similar for a second biological replicate of all three  
987 samples (WT, *med20* $\Delta$ , and *med3* $\Delta$ ).

988

989 **Fig 7: Increased internal Ty1i $\Delta$ POL transcript levels in Mediator tail mutant triad deletion**

990 **mutants.** (A) Northern blot probed with a Ty1 antisense riboprobe that hybridizes to Ty1, Ty1i,  
991 Ty1 $\Delta$ POL and Ty1i $\Delta$ POL RNA. Note that the full-length Ty1 $\Delta$ POL transcript cannot be distinguished  
992 from the rRNA band. Image is representative of three biological replicates. (B) Quantification for Ty1,  
993 Ty1i, and Ty1i $\Delta$ POL bands from (A). Quantification is representative of three biological replicates.  
994 Graph bar colors correspond to WT strain and the congenic *spt3* $\Delta$  strain as a negative control (grey  
995 bars), Mediator head subunit gene deletion strains (red bars), middle subunit gene deletion strains (blue  
996 bars) and tail subunit gene deletion strains (yellow bars). (C) Retrotransposition frequency of the  
997 chromosomal Ty1*his3AI-3114* element in WT, congenic *spt3* $\Delta$ , and Mediator subunit deletion strains  
998 bearing a plasmid containing pGTy1 $\Delta$ POL. Asterisks denote an upper limit mobility estimate in strains  
999 with no His<sup>+</sup> prototrophs among total cells plated. Graph bars are color-coded as in (B).

1000

1001 **Fig 8: Mediator occupancy at the Ty1 and Ty1i proximal promoters.** Occupancy of Med17-myc and  
1002 Med15-myc from the Mediator head and tail modules, respectively, was determined by ChIP-seq and

1003 summed over all Ty1 elements in *kin28-AA* yeast that were otherwise wild type (WT), *med20Δ*, or  
1004 carried the triple deletion *med2Δ med3Δ med15Δ*. ChIP-seq signals were normalized to an untagged  
1005 *kin28-AA* control (S1 Fig). The upstream occupancy peak is slightly downstream of the Ty1 TSS, likely  
1006 reflecting the location of Ste12 and Tec1 binding sites that are required for Ty1 transcription. Reads  
1007 deriving from the Ty1 TSS, and therefore in the LTR, are unavoidably also assigned to the 3' LTR,  
1008 leading to the observed signal in that region.

1009  
1010  
1011 **Fig 9: Promoter competition model for Mediator influence on Ty1 mobility.** In wild type yeast, the  
1012 Mediator complex acts at both the Ty1 and Ty1i proximal promoters, stimulating robust transcription of  
1013 Ty1 and a small amount of Ty1i expression that is sufficient to restrict mobility. Deletion of subunits  
1014 from the tail module triad increases Mediator activity at the Ty1i promoter, thus increasing Ty1i  
1015 production and reducing retromobility. Conversely, when a subunit from the head module is deleted, the  
1016 association between Mediator and the Ty1i promoter is disrupted, permitting increases in retromobility.  
1017 Finally, when the SAGA-dependent Ty1 promoter is swapped for the strong, TFIID-dependent *TEF1*  
1018 promoter, the complex preferentially associates with the Ty1 promoter, irrespective of the influence of  
1019 the tail module.

1020  
1021 **S1 Figure.** Occupancy of Mediator over Ty1 elements determined by ChIP-seq. Top, untagged control  
1022 subjected to ChIP-seq using anti-myc antibody. Bottom, occupancy of myc-tagged Med15 and Med17  
1023 over summed Ty1 elements in *med18Δ kin28-AA* yeast. Note the absence of any Mediator peak at the  
1024 Ty1i TSS.

1025  
1026 **S1 Table.** Yeast strains used in this work.



**A**

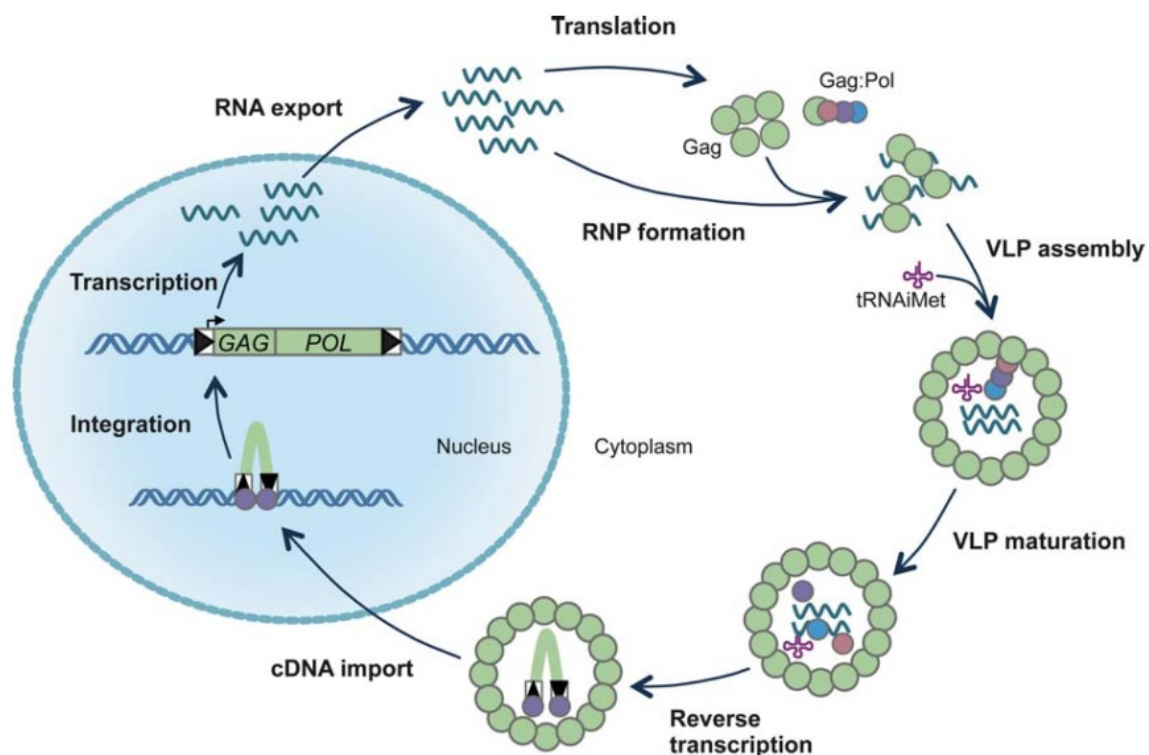

**B**

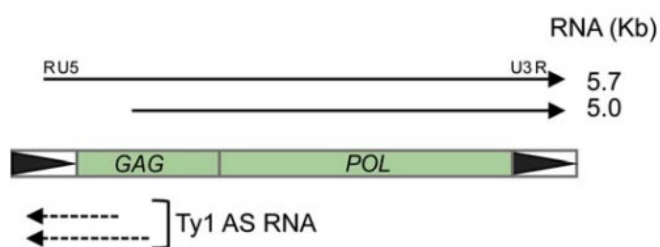

**C**

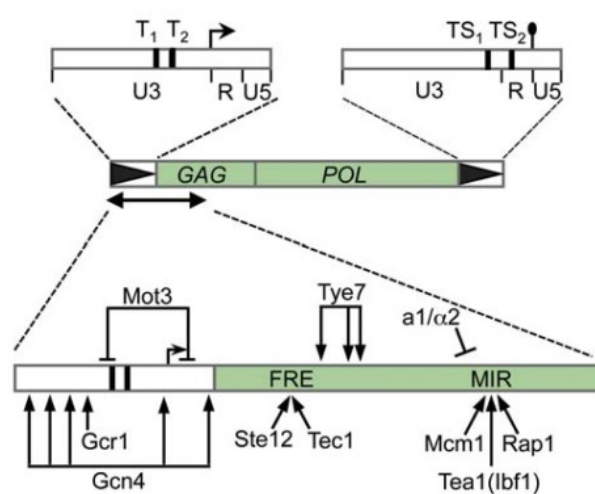



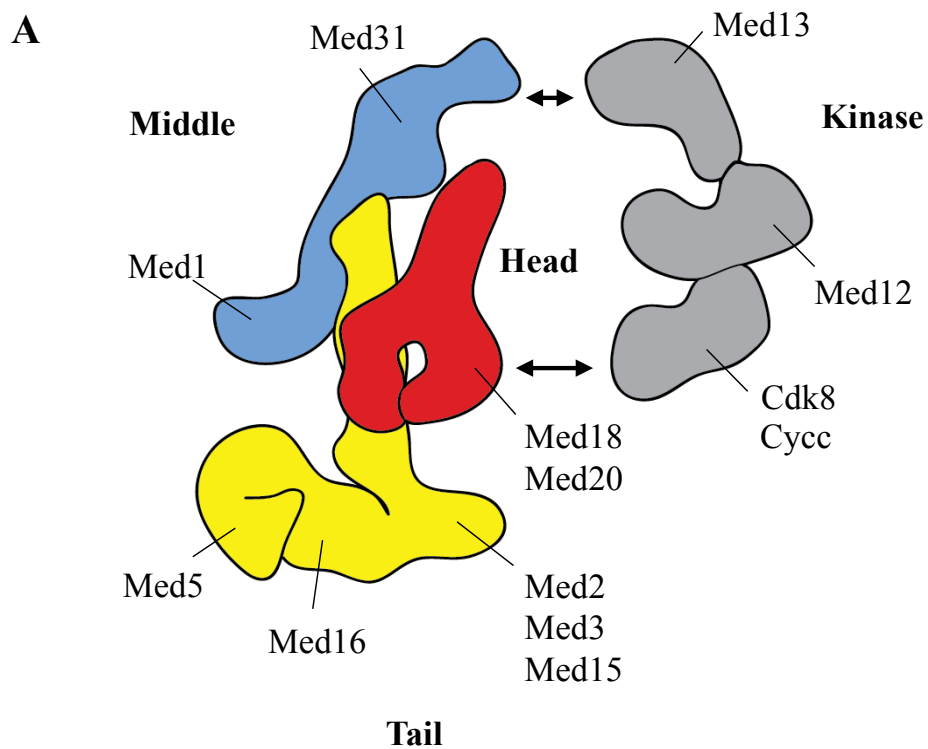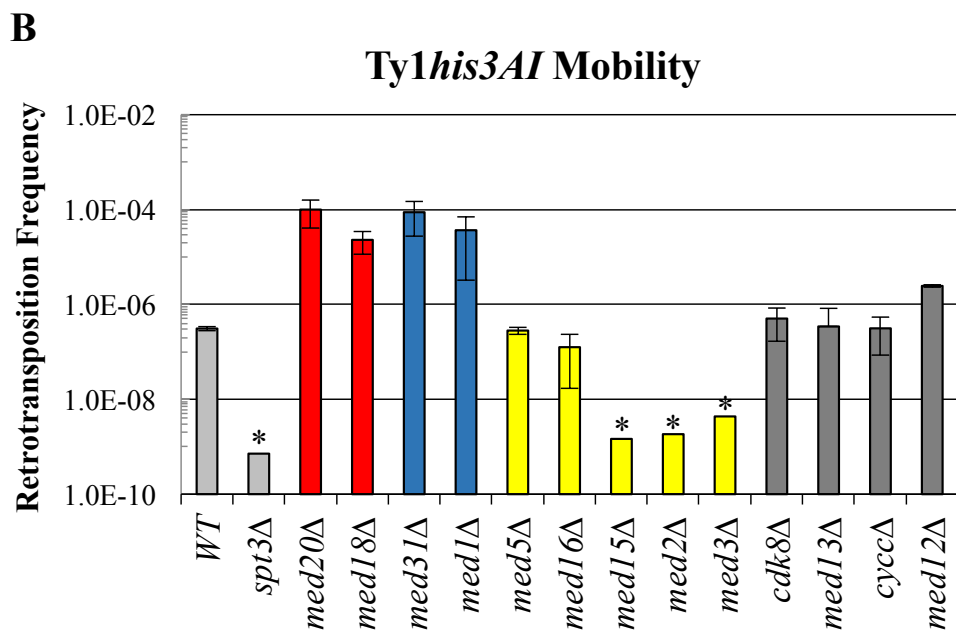

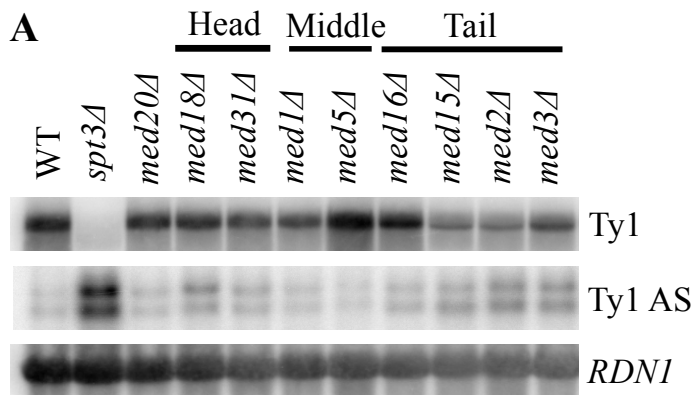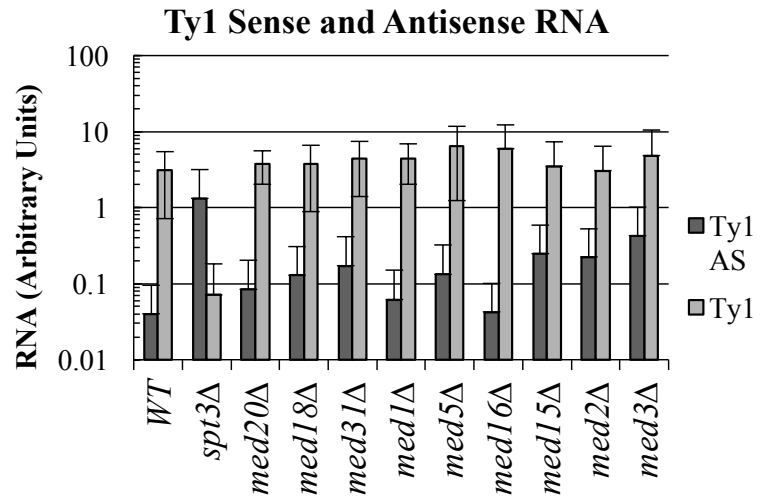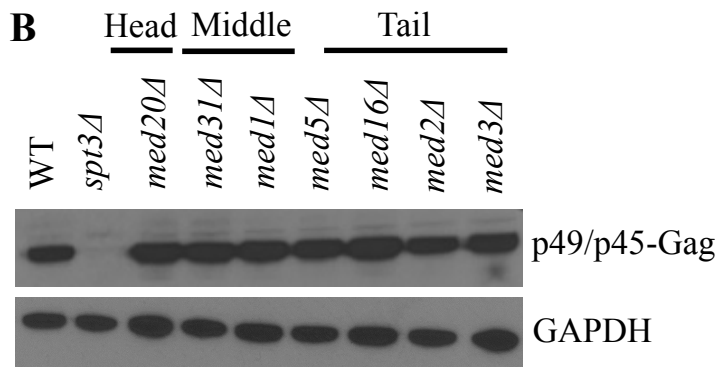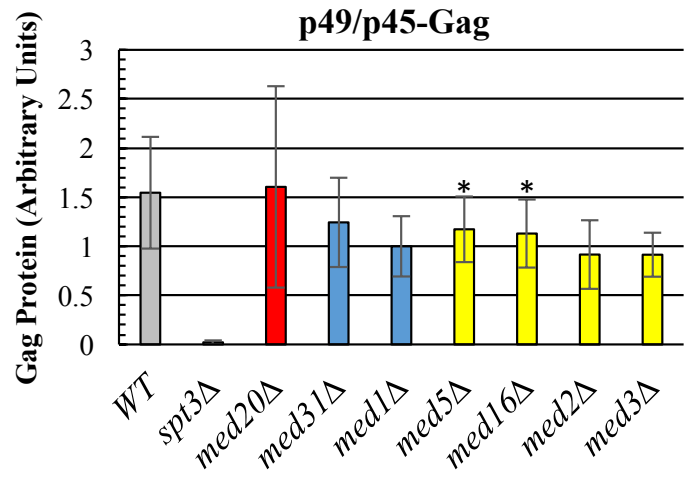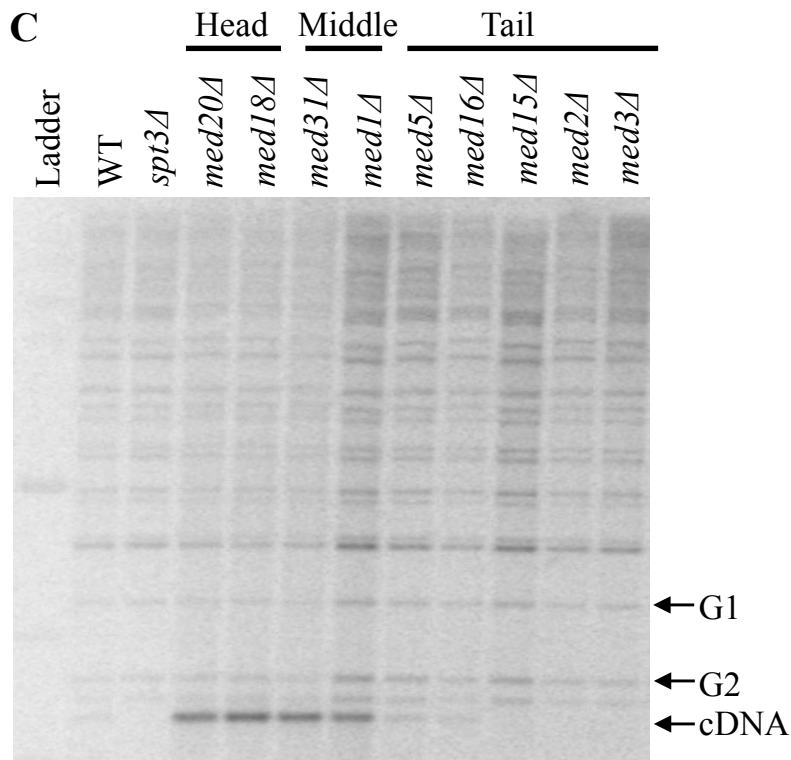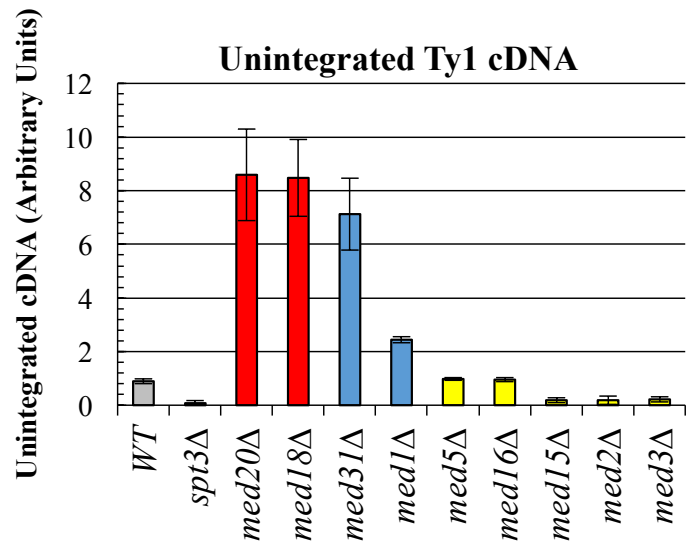

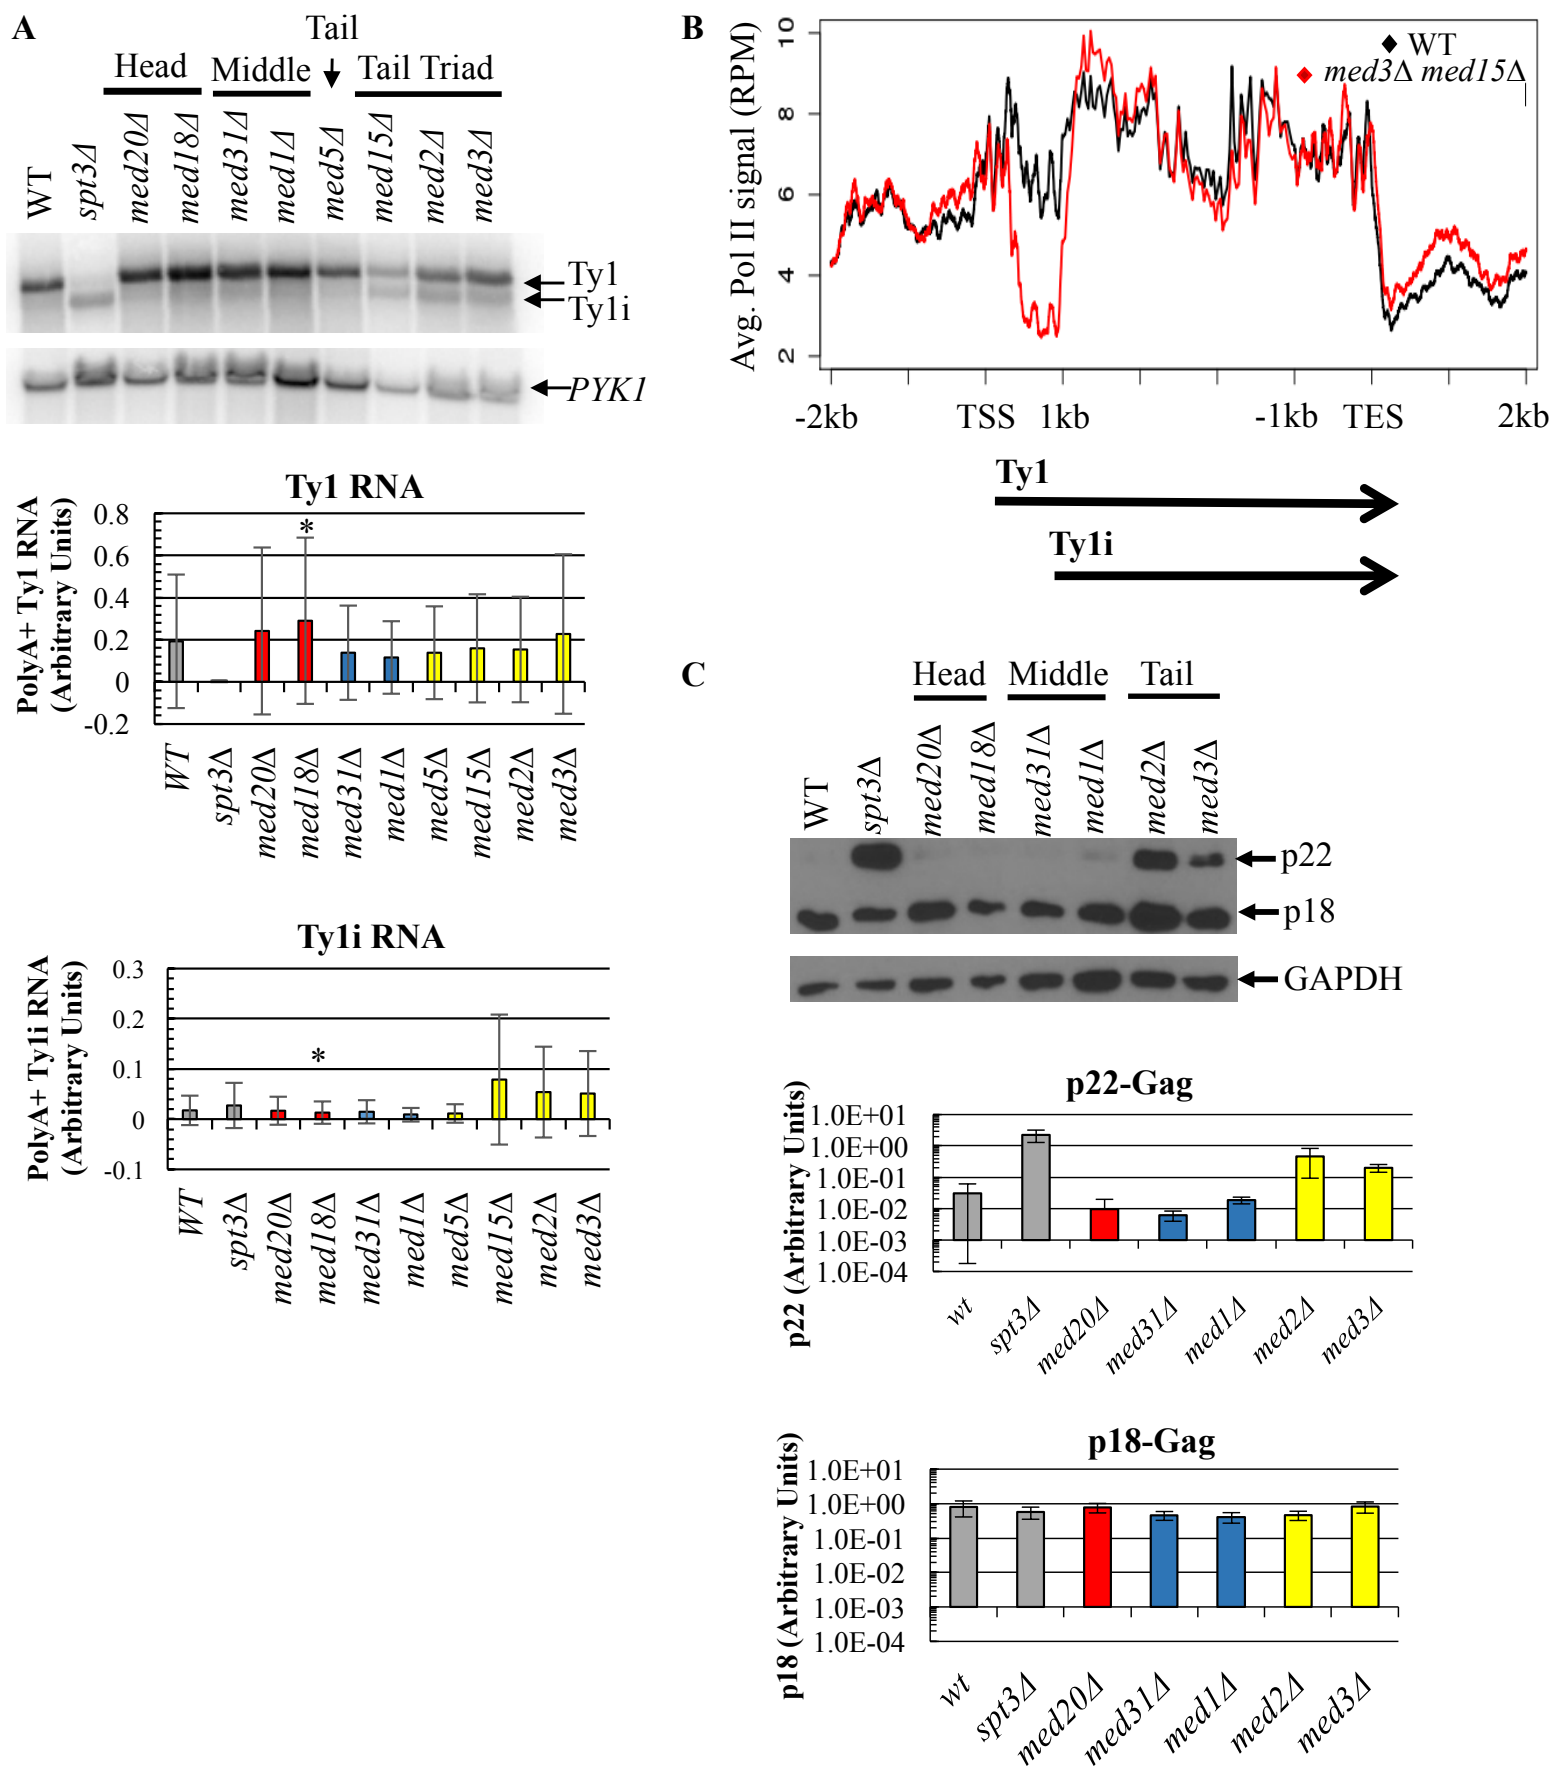

**A** LTR-Ty1*his3AI*

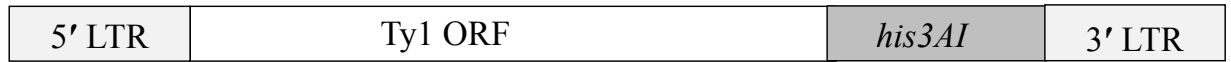

$P_{TEF1}$ -Ty1*his3AI*

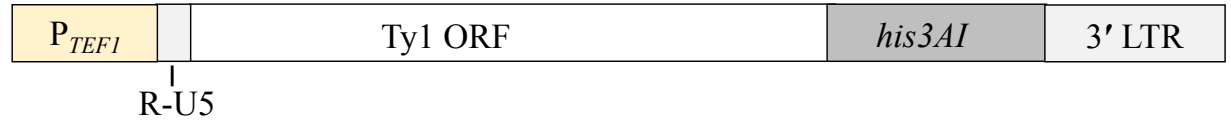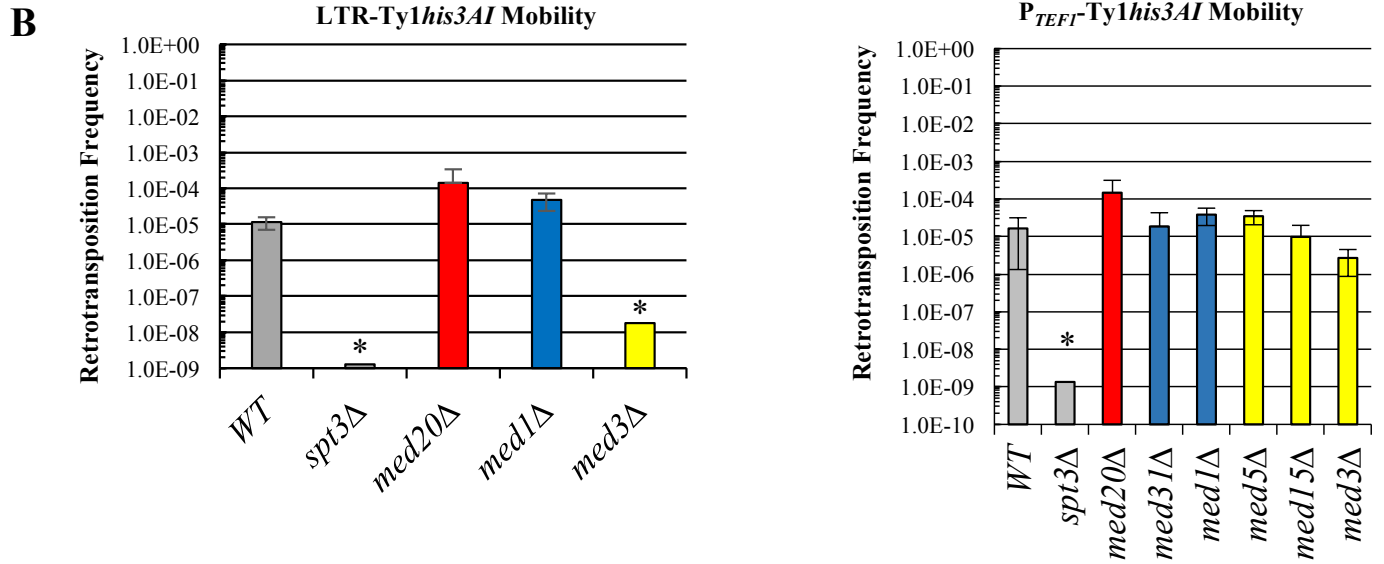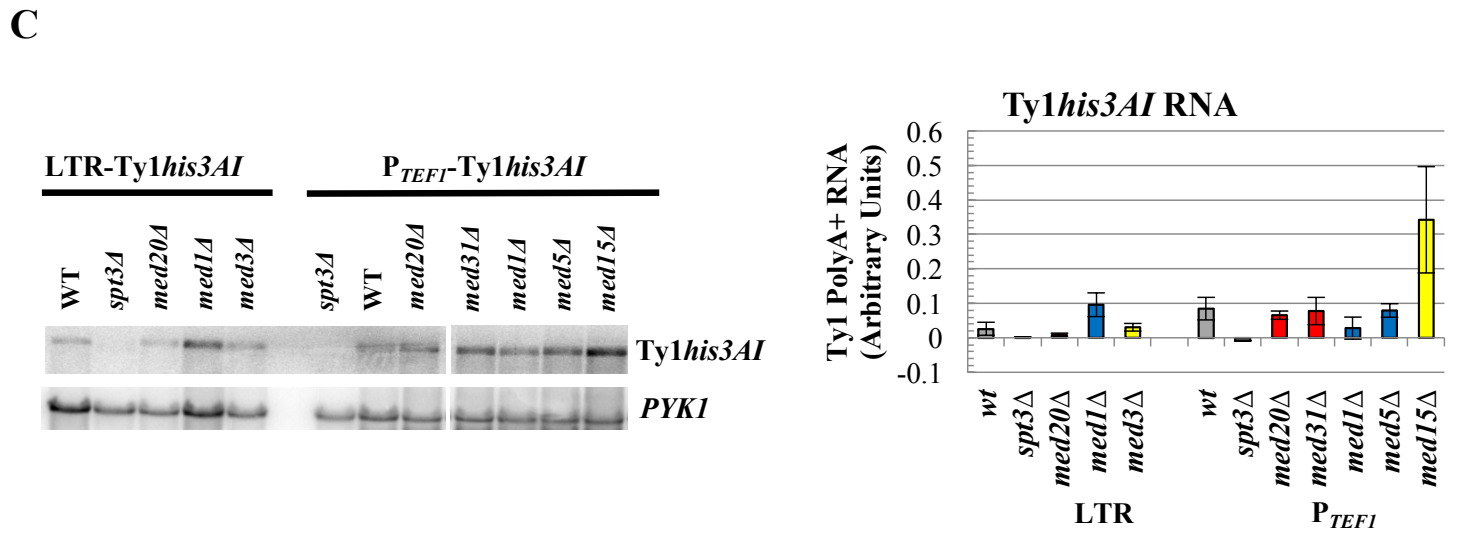

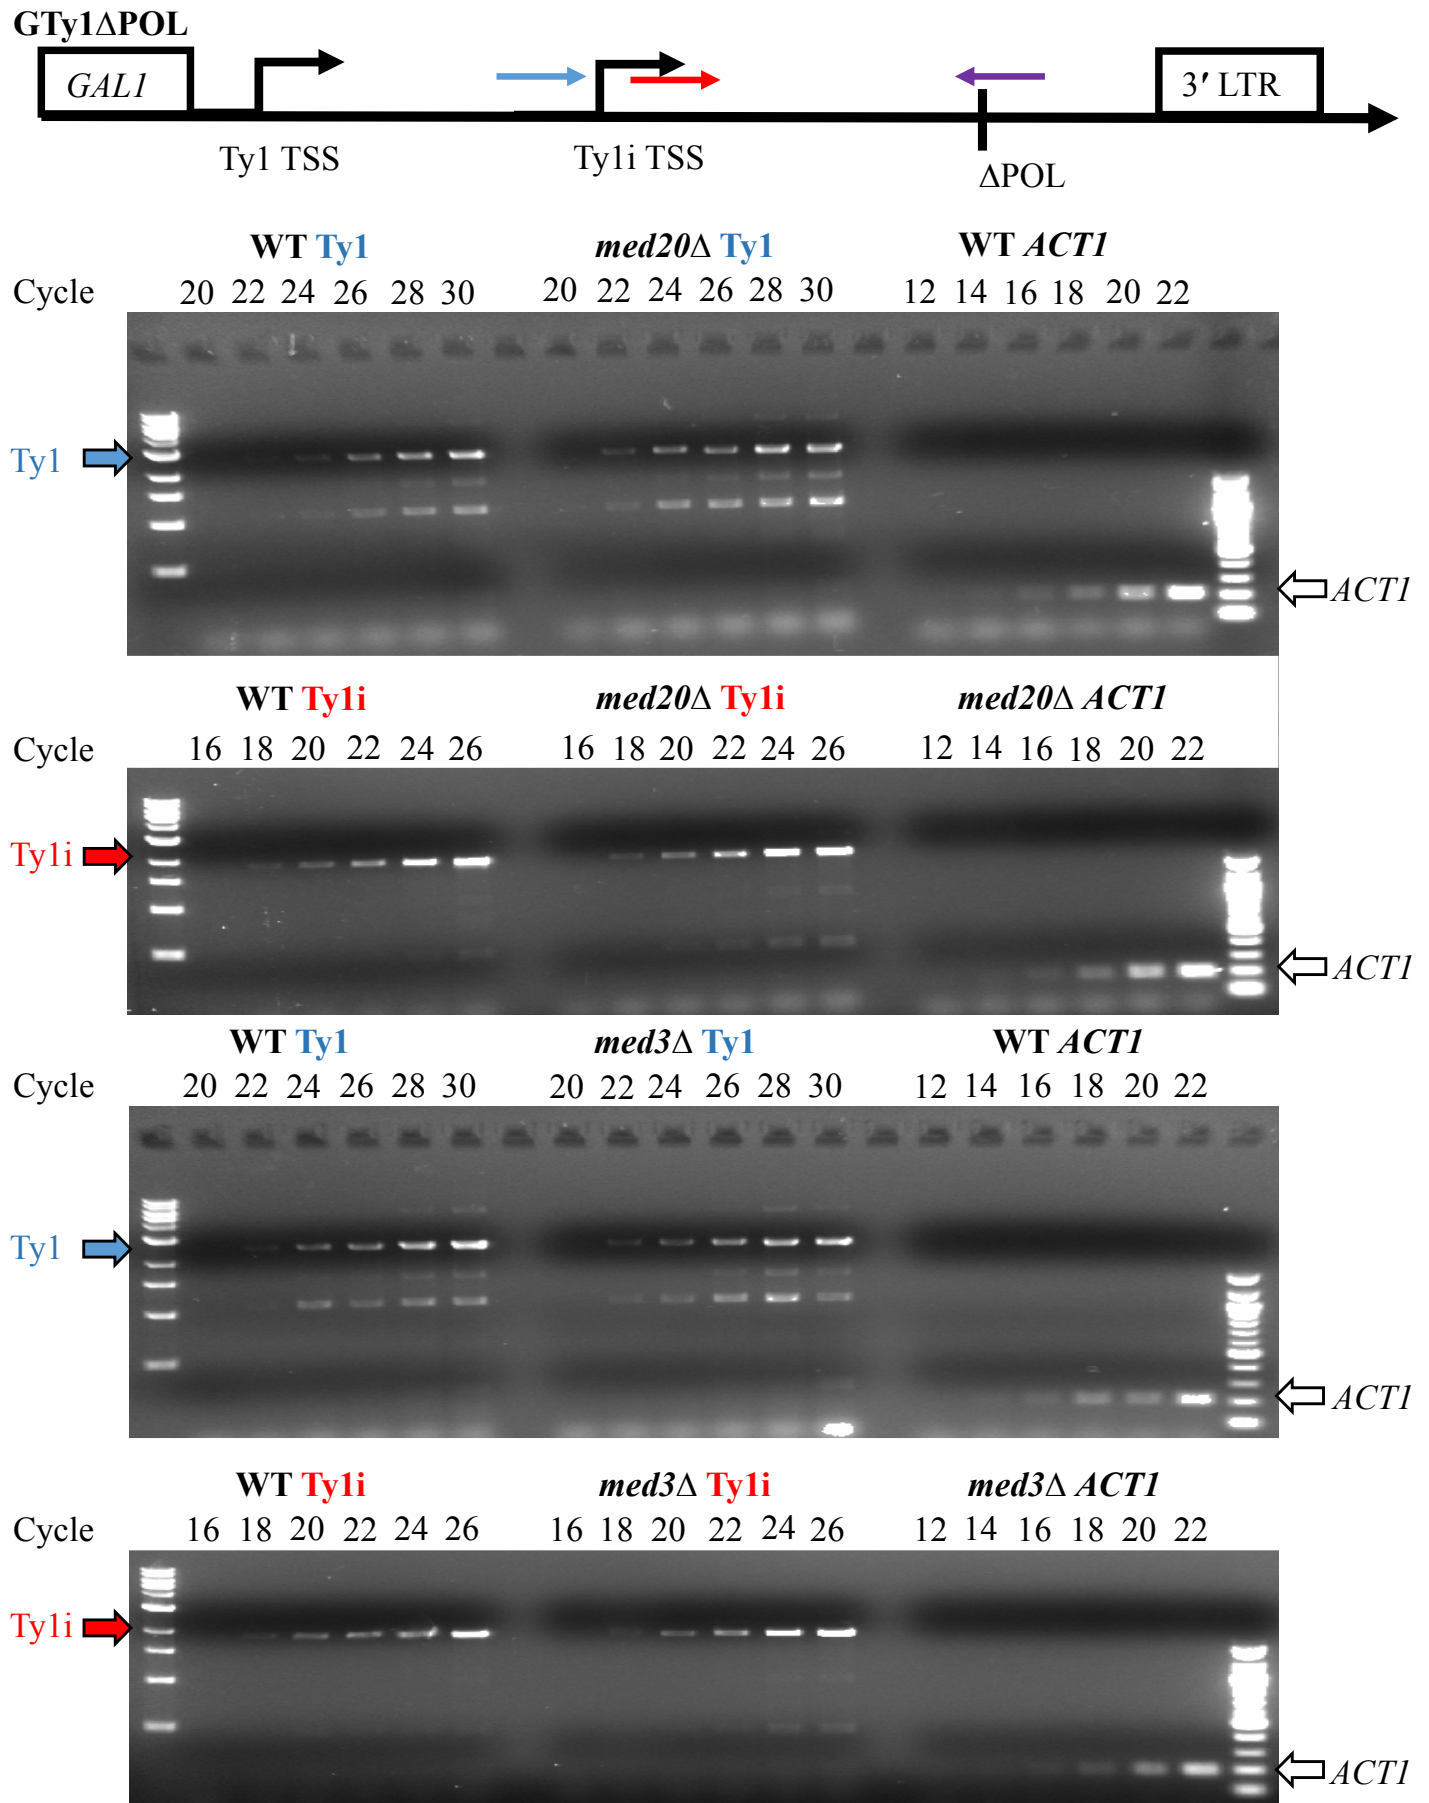

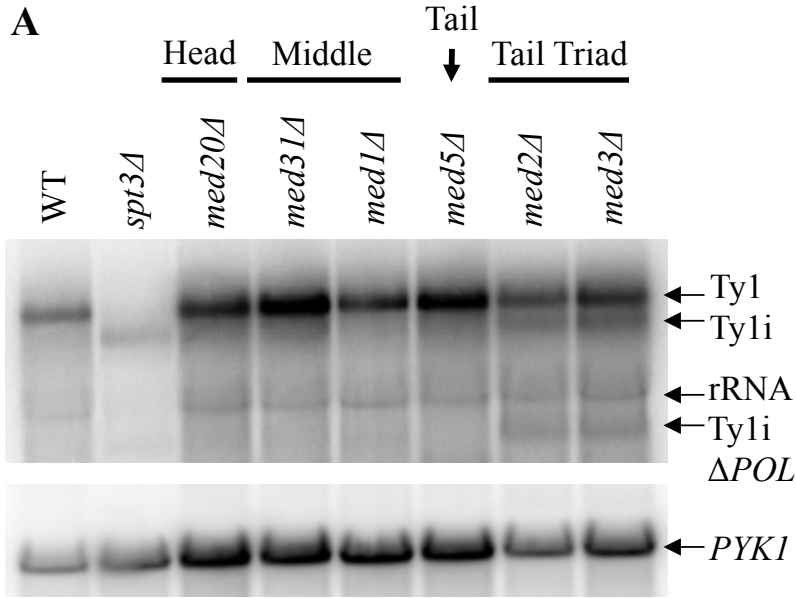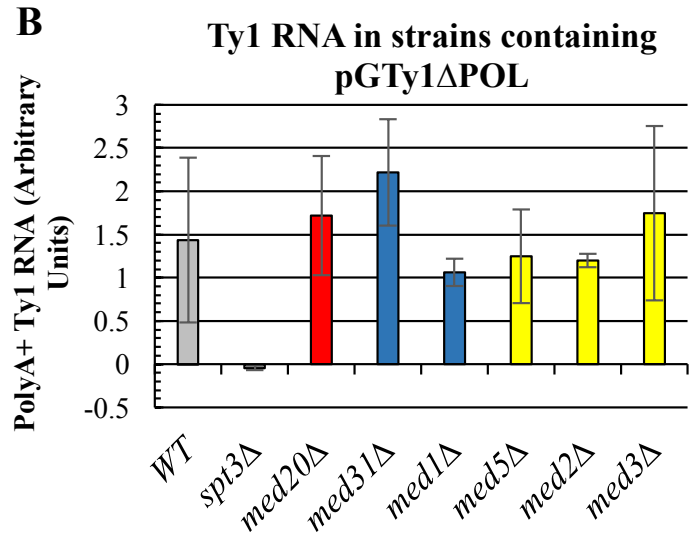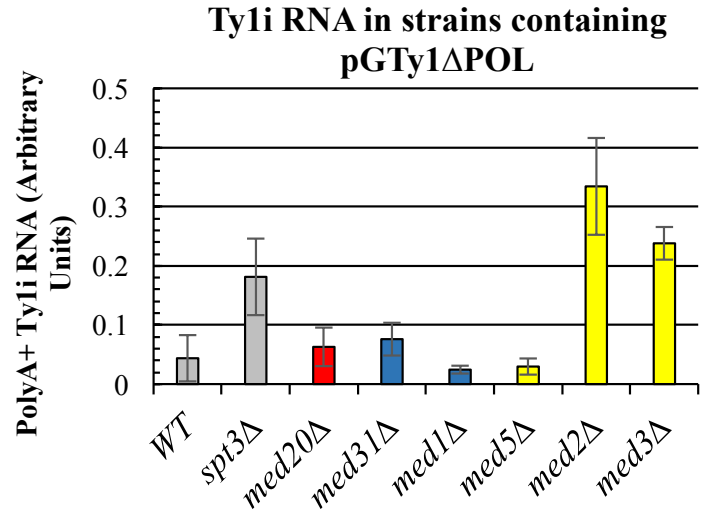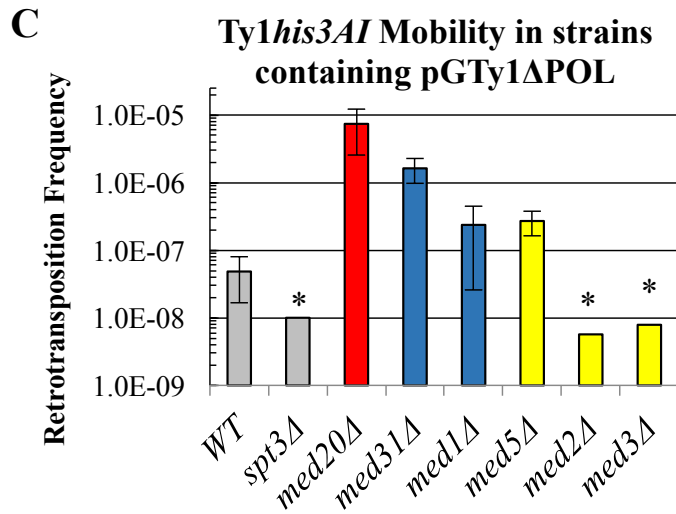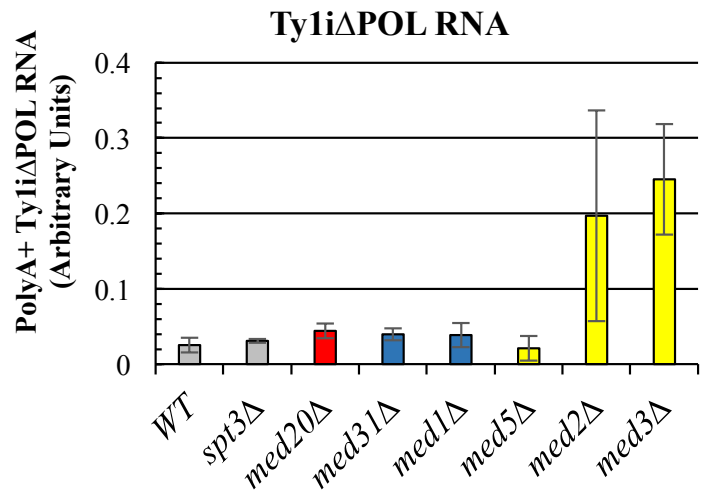

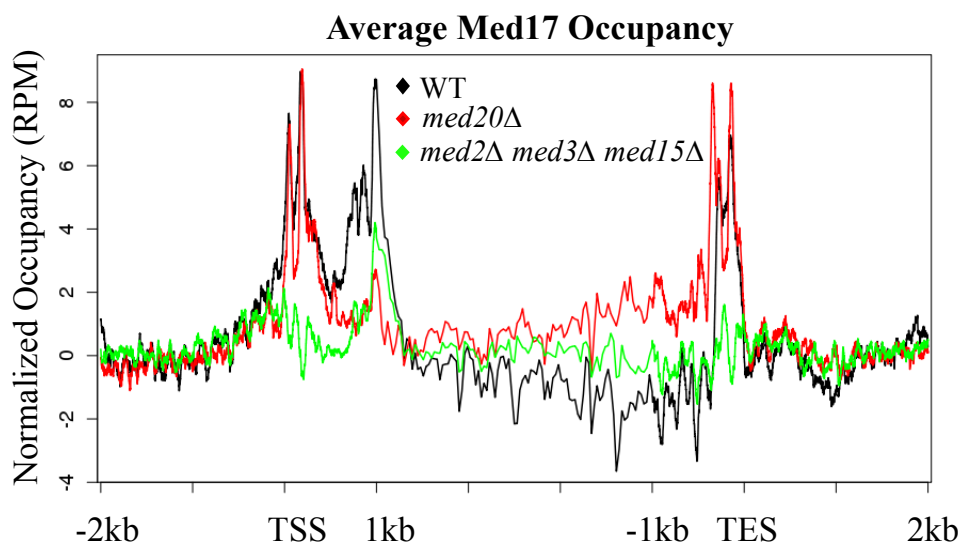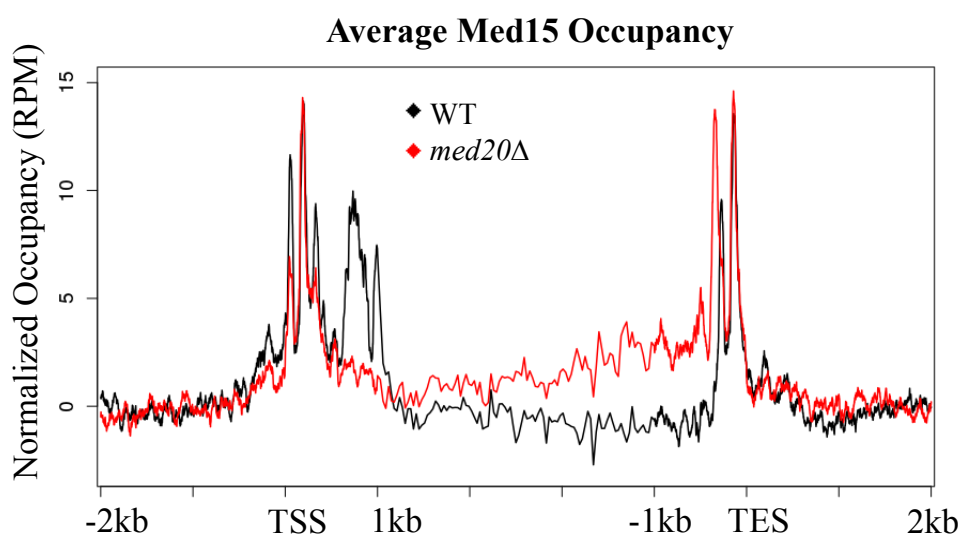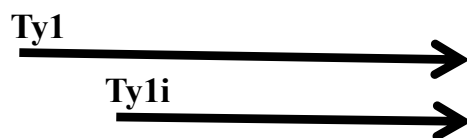

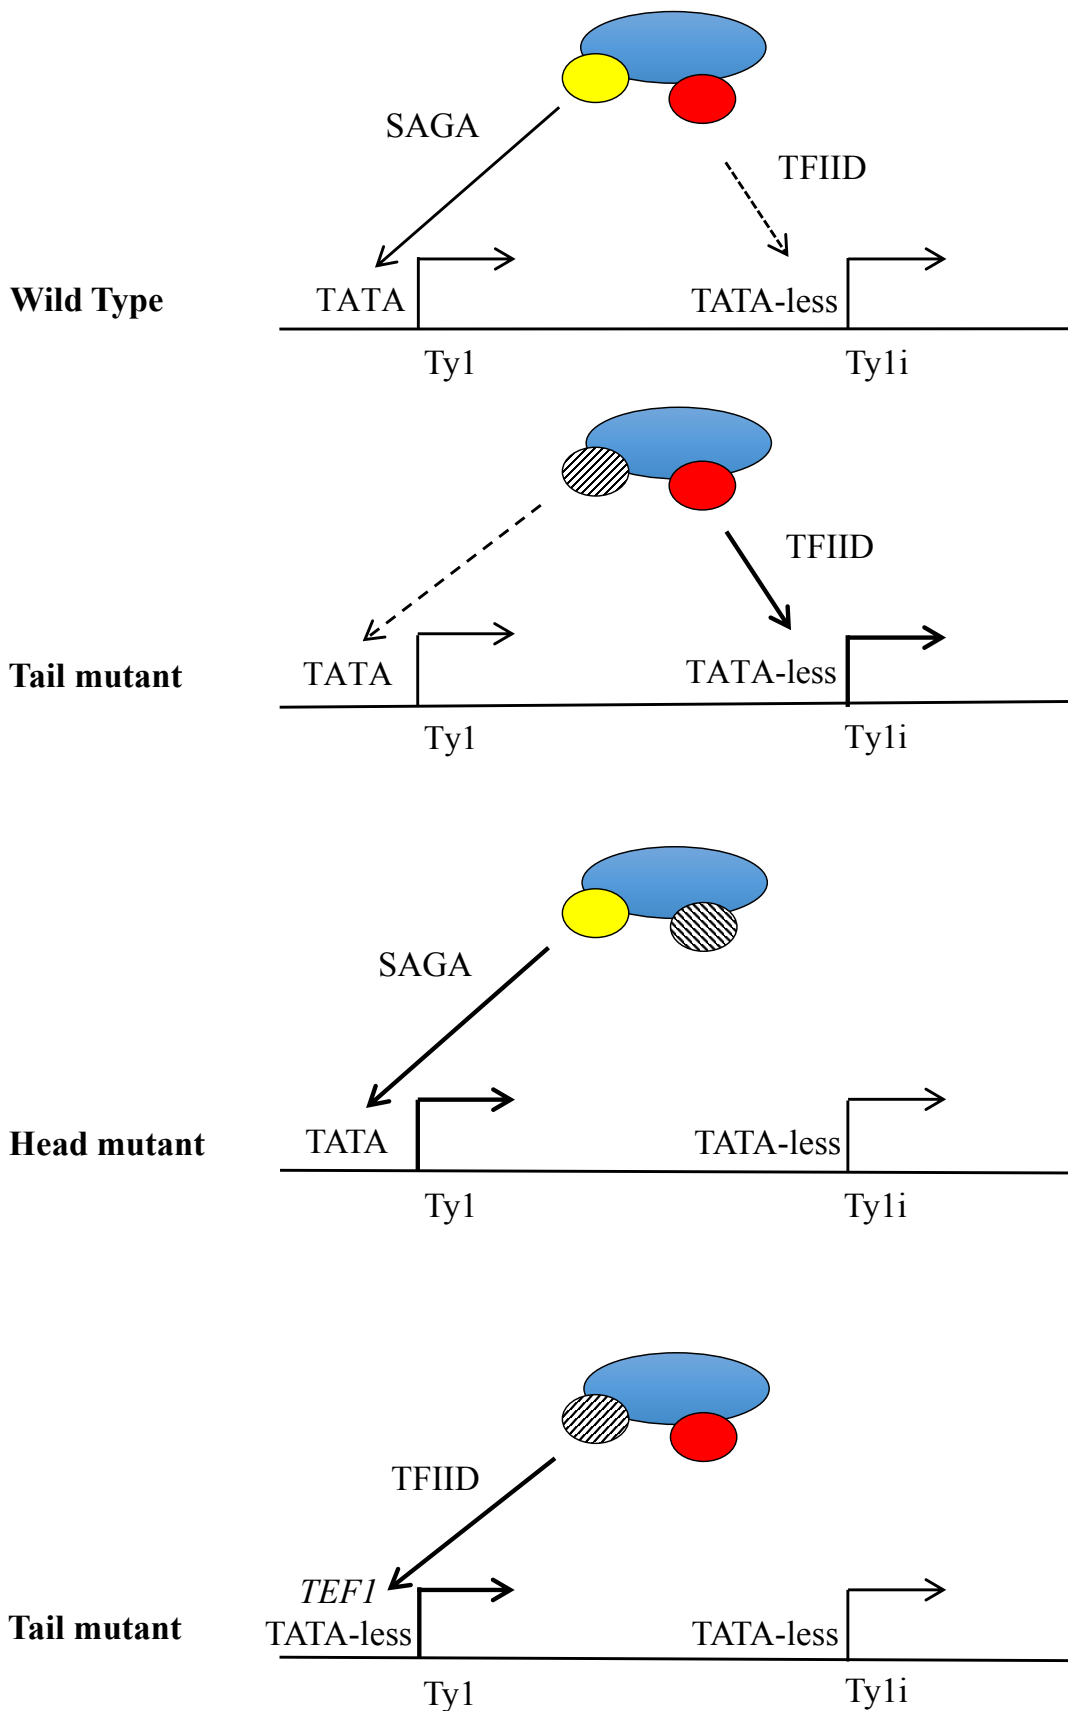

Source: http://www.biorxiv.org/content/10.1101/176248v1.full.pdf
